# Supplementary material for: Selective esterifications of alcohols and phenols through carbodiimide couplingsElectronic supplementary information (ESI) available: the characterization of new compounds and literature references for known compounds. See http://www.rsc.org/suppdata/ob/b3/b312559a/
Source: Royal Society of Chemistry journal article supplement (doi:10.1039/b312559a), 2004-01-01
Supplement: b312559a.doc [file b312559a.doc]

**Selective Esterifications of Alcohols and Phenols through Carbodiimide Couplings**

Rimma Shelkov, Moshe Nahmany and Artem Melman*

**Supplementary information.**

**Table of content.**

### A. Characterization data for new compounds and references for

known compounds Pages S2-S9

B. 1H NMR 300 MHz spectra of new compounds

**6a**  S10

**6b**  S11

**8a**  S12

**8b** S13

**9a**  S14

**9b**  S15

**10a**  S16

**11a**  S17

**12a**  S18

**12b**  S19

**13a**  S20

**23c**  S21

**24d**  S22

**33d**  S23

**General.**

All the reactions were performed in acetonitrile that were dried and distilled by standard procedures. The 1H spectra were acquired by Bruker AMX-300 and DRX-400 MHz instruments in CDCl3 using the residual solvent peak for calibration. IR spectra were recorded on FT-IR spectrometer in thin films.

**Methyl diethylphosphonoacetate (4a**). Aldrich NMR Library (60 MHz) *Second Ed.* *2*, 869D. Smith, P.; Brown, L.; Boutagy, J.; Thomas, R. *J. Med. Chem.* **1982**, *25*, 1222-1226.

**Methyl ethylmalonate (4b).**  Sato, M.; Ban, H.; Kaneko, C. *Tetrahedron Lett.* **1997**, *38*, 6689-6692..

**2-Bromoethyl diethylphosphonoacetate (5a)**. Prepared according to general procedure A (0.28 g, 91%). 1H NMR (300 MHz): 1.33 (t, *J*=7.2 Hz, 6H); 2.98 (d, *J*=21.6 Hz, 2H); 3.48 (t, *J*=6.3 Hz, 2H); 4.16 (quint., *J*=7 Hz, 4H); 4.42 ( t, *J*=6.3 Hz, 2H). 13C (75.48 MHz): 16.0 (d, *J*=9 Hz), 27.8, 33.7 (d, *J*=133 Hz), 62.5 (d, *J*=6 Hz), 64.4, 165 (d, *J*=6 Hz). Found C, 31.9; H, 5.2. Calc. for C8H16BrO5P: C, 31.7; H, 5.3%.

**2-Bromoethyl ethyl malonate (5b)**. Prepared according to general procedure A (0.22 g, 93%, 1H NMR (300 MHz): 1.30 (t, *J*=7.1 Hz, 3H); 3.43 (s, 2H); 3.53 (t, *J*=6.1 Hz, 2H); 4.24 (q., *J*=7.1 Hz, 2H); 4.46 (t, *J*=6.1 Hz, 2H). 13C (75.48 MHz): 14.0, 28.0, 41.3, 61.6, 64.6, 166.08, 166.12. Found C, 35.1; H, 4.9. Calc. for C7H11BrO4: C, 35.2; H, 4.6%.

**2-Ethoxyethyl diethylphosphonoacetate (6a)**. Prepared according to general procedure A (0.24 mg, 89%). 1H NMR (300 MHz): 1.12 (t, *J*=7.0 Hz, 3H); 1.27 (t, *J*=7.1 Hz, 6H); 2.94 (d, *J*=21.5 Hz, 2H); 3.45 (q, *J*=7.0 Hz, 2H); 3.57 (br. t, *J*=4.8 Hz, 2H); 4.16 (quint., *J*=7 Hz, 4H); 4.20 (br. t, *J*=4.8 Hz, 2H). ). 13C NMR (75.48 MHz): 14.4, 15.6 (d, *J*=6 Hz), 32.6, 34.3, 62.0 (d, *J*=7 Hz), 64.0, 65.8, 67.4, 165.0 (d, *J*=6 Hz).

**2-Ethoxyethyl ethyl malonate (6b)**. Prepared according to general procedure A (0.17 g, 86%). 1H NMR (300 MHz): 1.21 (t, *J*=7.0 Hz, 3H); 1.29 (t, *J*=7.1 Hz, 3H); 3.42 (s, 2H); 3.53 (q, *J*=7.0 Hz, 2H); 3.66 (m, 2 H); 4.21 (q., *J*=7.1 Hz, 2H); 4.30 (m, 2H). 13C NMR (75.48 MHz): 14.0, 15.0, 41.5, 61.5, 64.6, 66.6, 68.0, 166.4, 166.7.

**Phenyl diethylphosphonoacetate (7a**). Morita, T.; Okamoto, Y.; Sakurai, H. *Bull. Chem. Soc. Jpn*. **1978**, *51*, 2169-2170.

**Phenyl ethylmalonate (7b)**. ): 1.31 (t, *J*=7.3 Hz, 3H), 3.62 (s, 2H), 4.28 (q, *J*=7.3 Hz, 2H), 7.14 (m, 2H), 7.27 (m, 1H), 7.40 (m, 2H). 15162-26-2. Osman, A. M.; Swelim, A. A.; Ismail, M. T. *Bull. Fac. Sci., Assiut Univ.* **1979**, *4*, 153-157

**4-Methoxyphenyl diethylphosphonoacetate** **(8a)**. Prepared according to general procedure A (0.21 g, 69%). 1H NMR (300 MHz):1.36 (t, *J*=6.9 Hz, 6H); 3.17 (d, *J*=21.6 Hz, 2H); 3.79 (s, 3H); 4.22 (app. quint, *J*=7 Hz, 4H); 6.87, 7.02 (2xapp. d, *J*=7 Hz, 2x2H).

**4-Methoxyphenyl ethyl malonate (8b).** Prepared according to general procedure A (0.15 g, 61%, 1.30 (t, *J*=7.2 Hz, 3H); 3.59 (s, 2H); 3.79 (s, 3H); 4.23 (q, *J*=7.2 Hz, 2H); 6.89, 7.02 (2xapp. d, *J*=7 Hz, 2x2H).

**4-Cyanophenyl diethylphosphonoacetate (9a).** Prepared according to general procedure A. 1.38 (t, *J*=7.0 Hz, 6H); 3.24 (d, *J*=21.8 Hz, 2H); 4.22 (app. quint., *J*=7 Hz, 4H); 7.27, 7.71 (2xapp. d, *J*=7 Hz, 2x2H).

**4-Cyanophenyl ethyl malonate (9b).** Prepared according to general procedure A. 1H NMR (300 MHz): 1.31 (t, *J*=7.2 Hz, 3H); 3.62 (s, 2H); 4.26 (q, *J*=7.2 Hz, 2H); 7.26, 7.69 (2xapp. d, *J*=7 Hz, 2x2H).

**4-Nitrophenyl diethylphosphonoacetate (10a).** Prepared according to general procedure A. 1H NMR (300 MHz):1.38 (t, *J*=7.0 Hz, 6H); 3.23 (d, *J*=21.6 Hz, 2H); 4.24 (app. quint., *J*=7 Hz, 4H); 7.33, 8.28 (2xapp. d, *J*=7 Hz, 2x2H).

**4-Nitrophenyl ethylmalonate (10b).** 1.33 (t, *J*=7.2 Hz, 3H); 3.65 (s, 2H); 4.28 (q, *J*=7.2 Hz, 2H); 7.32, 8.29 (2xapp. d, *J*=7 Hz, 2x2H). Isaacs, N. S.; Najem, T. S. *J. Chem. Soc., Perkin 2* **1988**, 557-562.

**2,4,6-Trichlorophenyl diethylphosphonoacetate (11a)**. Prepared according to general procedure A. 1H NMR (300 MHz): 1.31 (t, *J*=7.2 Hz, 6H); 3.27 (d, *J*=21.6 Hz); 4.24 (quint, *J*=7 Hz, 4H); 7.38 (s, 2H).

**2,4,6-Trichlorophenyl ethyl malonate (11b)**. Prepared according to general procedure A. 1H NMR (300 MHz): 1.32 (t, *J*=7.2 Hz, 3H); 3.70 (s, 2H); 4.28 (q, *J*=7.2 Hz, 2H); 7.39 (s, 2H). Found C, 42.6; H, 3.0. Calc. for C11H9Cl3O4: C, 42.4; H, 2.9;

**Pentafluorophenyl diethylphosphonoacetate (12a)**. Prepared according to general procedure A. 1H NMR (300 MHz): 1.38 (t, *J*=7.2 Hz, 6H); 3.27 (d, *J*=21.9 Hz); 4.24 (quint, *J*=7 Hz, 4H).

**Pentafluorophenyl ethyl malonate (12b)**. Prepared according to general procedure A. 1H NMR (300 MHz): 1.33 (t, *J*=7.2 Hz, 3H); 3.71 (s, 2H); 4.28 (q, *J*=7.2 Hz, 2H).

**Pentachlorophenyl diethyl phosphonoacetate (13a).** Prepared according to general procedure A. 1H NMR (300 MHz): 1.38 (t, *J*=7.2 Hz, 6H); 3.30 (d, *J*=21.9 Hz); 4.24 (quint, *J*=7 Hz, 4H). Found C, 32.25; H, 2.9. Calc. for C12H12Cl5O5: C, 32.4; H, 2.7%.

**Pentachlorophenyl ethyl malonate (13b).** 1.37 (t, *J*=7.1 Hz, 3H); 3.72 (s, 2H); 4.29 (q, *J*=7.1 Hz, 2H). Bienert, M.; Kuehler, M.; Bergmann, *J*.; Mehlis, B.; Niedrich, H. Patent Ger. (East) 1974, DD107947.

***o*-Cresyl diphenylacetate** **(21c)**: Prepared according to general procedure D (0.14 g, 45%). 3.79 (s, 3H); 5.29 (s, 1H), 6.9-7.4 (m, 14H); Found C, 83.1; H, 6.1. Calc. for C21H17O2: C, 83.4; H, 6.0%.

***o*-Cresyl -undecenoate (21d)**: Prepared according to general procedure D (0.145 g, 53%). 1.0-1.4 (m, 10H); 1.68 (br. q. 2H); 2.0-2.1 (br.q., 2H); 2.25 (s, 3H); 2.53 (t, 2H, *J*=7.3 Hz); 4.94 (br. d, 1H, *J*=10 Hz); 5.00 (br. d, 1H, *J*=18 Hz); 5.79 (ddt, 1H, *J*=10, 18, 7 Hz); 6.7-6.9 (m, 2H); 7.0-7.1 (m, 2H). Found C, 78.1; H, 9.4. Calc. for C18H26O2: C, 78.8; H, 9.55%.

**4-Methoxyphenyl diphenylacetate (22c)**. 71%; 3.78 (s, 3H); 5.24 (s, 1H); 6.85 (d, 2H, *J*= 9.2 Hz); 6.96 (d, 2H, *J*= 9.2 Hz); 7.10-7.40 (m, 10H). Do Amaral, A. T.; Do Amaral, L, *J. Org. Chem*. **1976**, *41*, 1623-1627.

**4-Methoxyphenyl -undecenoate (22d)**. Prepared according to general procedure D (0.21 g, 73%). 1.0-1.4 (m, 10H); 1.68 (br. q. 2H); 2.0-2.1 (br.q., 2H); 2.53 (t, 2H, *J*=7.4 Hz); 3.79 (s, 3H); 4.94 (br. d, 1H, *J*=10 Hz); 5.00 (br. d, 1H, *J*=18 Hz); 5.79 (ddt, 1H, *J*=10, 18, 7 Hz); 6.87 (d, 2H, *J*=9 Hz); 7.68 (d, 2H, *J*=9 Hz). Found, C, 74.3; H, 9.15. Calc. for C18H26O3: C, 74.45; H, 9.0%.

**4-Cyanophenyl diphenylacetate (23c)**. Prepared according to general procedure D (0.28 g, 90%). 5.28 (s, 1H); 7.10-7.40 (m, 12H); 7.53 (d, 2H, *J*=8.9 Hz).

**4-Cyanophenyl -undecenoate (23d)**. Prepared according to general procedure D (0.27 g, 95%). 1.0-1.4 (m, 10H); 1.68 (br. q. 2H) 2.0-2.1 (br.q., 2H); 2.58 (t, 2H, *J*=7.4 Hz); 4.94 (br. d, 1H, *J*=10 Hz); 5.00 (br. d, 1H, *J*=18 Hz); 5.79 (ddt, 1H, *J*=10, 18, 7 Hz); 7.22 (d, 2H, *J*=8.7 Hz); 7.68 (d, 2H, *J*=8.7 Hz); Found C, 75.65; H, 8.35; N, 5.0. Calc. for C18H23NO2: C, 75.8; H, 8.1; N, 4.9%.

**2,4,6-Trichlorophenyl diphenylacetate** **(24c)**. Prepared according to general procedure D (0.35 g, 88%). 5.40 (s, 1H); 7.20-7.40 (m, 12H). Found C, 61.5; H, 3.4. Calc. for C10H13Cl3O2: C, 61.3; H, 3.3%.

**2,4,6-Trichlorophenyl -undecenoate (24d)**. Prepared according to general procedure D (0.35 g, 94%; 1.0-1.4 (m, 10H); 1.68 (br. q. 2H); 2.0-2.1 (br.q., 2H); 2.66 (t, 2H, *J*=7.4 Hz); 4.94 (br. d, 1H, *J*=10 Hz); 5.00 (br. d, 1H, *J*=18 Hz); 5.79 (ddt, 1H, *J*=10, 18, 7 Hz); 7.38 (s, 2H).

**4-Nitrophenyl diphenylacetate (25c)**. Prepared according to general procedure D (0.30 g, 90%). 5.31 (s, 1H); 7.20-7.40 (m, 12H); 7.53 (d, 2H, *J*=8.9 Hz). Found C, 72.2; H, 5.0; N, 3.7. Calc. for C16H15NO4: C, 72.1; H, 4.5; N, 4.2%.

**4-Nitrophenyl -undecenoate (25d).** Prepared according to general procedure D (0.30 g, 98%). 1.0-1.4 (m, 10H); 1.68 (br. q. 2H); 2.0-2.1 (br.q., 2H); 2.59 (t, 2H, *J*=7.8 Hz); 4.94 (br. d, 1H, *J*=10 Hz); 5.00 (br. d, 1H, *J*=18 Hz); 5.79 (ddt, 1H, *J*=10, 18, 7 Hz); 7.27 (d, 2H, *J*=7.8 Hz); 8.26 (d, 2H, *J*=7.8 Hz). Found C, 67.15; H, 7.7, N, 4.4. Calc. for C17H23NO4: C, 66.9; H, 7.6; N, 4.6%.

**Pentachlorophenyl diphenylacetate (26c)**. Prepared according to general procedure D (0.42 g, 91%). 5.39 (s, 1H), 7.20-7.40 (m, 10H); 8.26 (d, 2H, *J*=7.5 Hz). 13C NMR (75.48 MHz): 56.3, 127.7, 127.8, 128.74, 128.81, 131.6, 131.9, 136.9, 143.9, 168.45. Found C, 52.4; H, 2.5. Calc. for C20H11Cl5O2: C, 52.3; H, 2.4%.

**Pentachlorophenyl -undecenoate (26d)**. Prepared according to general procedure D (0.40 g, 92%). 1.0-1.4 (m, 10H); 1.68 (br. q. 2H) 2.0-2.1 (br.q., 2H); 2.66 (t, 2H, *J*=7.4 Hz); 4.94 (br. d, 1H, *J*=10 Hz); 5.00 (br. d, 1H, *J*=18 Hz); 5.79 (ddt, 1H, *J*=10, 18, 7 Hz). ). 13C NMR (75.48 MHz): 24.6, 28.8, 28.96, 28.99, 29.1, 29.2, 33.6, 33.7, 114.1, 127.6, 131.3, 131.9, 139.1, 144.1, 169.4. ). Found C, 47.5; H, 4.6. Calc. for C17H19Cl5O2: C, 47.2; H, 4.4%.

**Pentafluorophenyl diphenylacetate (27c)**. Prepared according to general procedure D (0.36 g, 97%). 5.39 (s, 1H), 7.20-7.40 (m, 10H); 7.53 (d, 2H, *J*=8.9 Hz). Found C, 63.6; H, 3.1. Calc. for C20H11F5O2: C, 63.5; H, 2.9%.

**Pentafluorophenyl -undecenoate (27d)**. Prepared according to general procedure D (0.31 g, 89%). 1.0-1.4 (m, 10H); 1.68 (br. q. 2H) 2.0-2.1 (br.q., 2H); 2.66 (t, 2H, *J*=7.4 Hz); 4.94 (br. d, 1H, *J*=10 Hz); 5.00 (br. d, 1H, *J*=18 Hz); 5.79 (ddt, 1H, *J*=10, 18, 7 Hz). Calc. for C17H19F5O2: C, 58.3; H, 5.5; Found C, 58.55; H, 5.6%.

**N-Diphenylacetoxysuccinimide (28c)**. 88%; 2.81 (br. s, 4H); 5.35 (s, 1H); 7.20-7.40 (m, 10H). Scanlan, T. S.; Baxter, *J*. D.; Fletterick, R. *J*.; Wagner, R. L.; Kushner, P. *J*.; Apriletti, *J*. W.; West, B. L.; Shiau, A. K. PCT Int. Appl*.* **1999** WO9926966.

**N--Undecenoylsuccinimide (28d)**. 71%; 1.0-1.4 (m, 10H); 1.68 (br. q. 2H); 2.0-2.1 (br.q., 2H); 2.63 (t, 2H, *J*=7.4 Hz); 2.91 (br.s, 4H); 4.94 (br. d, 1H, *J*=10 Hz); 5.00 (br. d, 1H, *J*=18 Hz); 5.79 (ddt, 1H, *J*=10, 18, 7 Hz). Mazitschek, R.; Mulbaier, M.; Giannis, A. *Angew. Chem., Int. Ed.* **2002**, *41*, 4059-4061.

**S-(2-Hydroxyethyl) diphenylethanethioate (29c)**. Prepared according to general procedure D (0.24 g, 87%). 3.12 (t, 2H, *J*=6.3 Hz); 3.75 (t, 2H, *J*=6.3 Hz); 5.22 (s, 1H), 7.20-7.40 (m, 10H). Found C, 70.35; H, 6.5. Calc. for C13H24O2S C, 70.6; H, 5.9%.

**S-(2-Hydroxyethyl) undec-10-enethioate (29d)**. Prepared according to general procedure D (0.175 g, 72%). 1.0-1.4 (m, 10H); 1.68 (br. q. 2H) 2.0-2.1 (br.q., 2H); 2.59 (t, 2H, *J*=7.5 Hz); 3.09 (t, 2H, *J*=6.0 Hz); 3.78 (t, 2H, *J*=6.0 Hz); 4.94 (br. d, 1H, *J*=10 Hz); 5.00 (br. d, 1H, *J*=18 Hz); 5.79 (ddt, 1H, *J*=10, 18, 7 Hz). ). 13C NMR (75.48 MHz): 25.5, 28.78, 28.82, 28.94, 29.08, 29.14, 31.7, 33.7, 44.1, 61.8, 114.1, 139.1, 200.1. Found C, 64.0; H, 9.8. Calc. for C16H16O2S; C, 63.9; H, 9.9%.

**Methyl [(diphenylacetyl)thio]acetate (30c)**. Prepared according to general procedure D (0.28 g, 92%). 3.72 (s, 2H); 3.73 (s, 3H); 5.23 (s, 1H), 7.20-7.40 (m, 10H). Found C, 67.9; H, 5.5. Calc. for C17H16O4S; C, 68.0; H, 5.4%.

**Methyl (undec-10-enoylthio)acetate (30d)**. Prepared according to general procedure D (0.225 g, 93%). 1.0-1.4 (m, 10H); 1.68 (br. q. 2H); 2.0-2.1 (br.q., 2H); 2.59 (t, 2H, *J*=7.5 Hz); 3.72 (s, 2H); 3.73 (s, 3H); 4.94 (br. d, 1H, *J*=10 Hz); 5.00 (br. d, 1H, *J*=18 Hz); 5.79 (ddt, 1H, *J*=10, 18, 7 Hz). Found C, 61.65; H, 8.9. Calc. for C14H24O2S C, 61.7; H, 8.9%.

***N*-cyclohexyl-*N*-[(cyclohexylamino)carbonyl]-diphenylacetamide (31c)**: Obtained as side product in the preparation of **22c** according to general procedure D (80 mg, 19%) 1.0-2.0 (br. m., 20H); 3.67 (br. m, 1H), 3.88 (br. t, 1H); 5.24 (s, 1H), 7.20-7.40 (m, 10H); Found, C, 77.7; H, 8.3; N, 6.75. Calc. for C33H42N2O2 C, 77.5; H, 8.2; N, 6.7%.

***N*-cyclohexyl-*N*- [(cyclohexylamino) carbonyl]--undecenemide (31d)**: Obtained as side product in the preparation of **22d** according to general procedure D (62 mg, 16%). 1.0-2.1 (br. m., 34H); 2.40 (t, *J*=7.8 Hz); 3.7 (br. m, 1H), 3.88 (br. t, 1H); 4.94 (br. d, 1H, *J*=10 Hz); 5.00 (br. d, 1H, *J*=18 Hz); 5.79 (ddt, 1H, *J*=10, 18, 7 Hz). Found, C, 73.8; H, 10.8; N, 7.2. Calc. for C24H42N2O2 C, 73.7; H, 10.8; N, 6.8%.

**Pentafluorophenyl propionate (32a)**. 1.31 (t, *J*=7.1 Hz, 3H); 2.70 (q, *J*=7.1 Hz, 2H). Breslav, M. S.; Kalejs, U.; Pupikina, S.; Doviborov, N. *J. Chem. Res., Synops.* **1992**, *8*, 272-273.

**4-Cyanophenyl propionate (32b)**.1.27 (t, *J*=7.2 Hz, 3H); 2.62 (q, *J*=7.2 Hz, 2H); 7.23 (app.d, *J*=9 Hz, 2H); 7.69 (app. d, *J*=9 Hz, 2H). Yamamoto, T.; Ishizu, *J*.; Kohara, T.; Komiya, S.; Yamamoto, A. *J. Am. Chem. Soc.* **1980**, *102*, 3758-3764.

**Diphenylacetic acid anhydride (33c).** Prepared according to general procedure G (0.14 g, 5.04 (s, 2H), 7.10-7.40 (m, 20H). Found C, 82.7; H, 5.5. Calc. for C28H22O3; C, 82.75; H, 5.5%.

**-Undecenoic acid anhydride (33d).** Prepared according to general procedure G (0.14 g, 1.0-1.4 (m, 10H); 1.68 (br. q. 2H); 2.0-2.1 (br.q., 2H); 2.45 (t, 2H, *J*=7.5 Hz); 4.94 (br. d, 1H, *J*=10 Hz); 5.00 (br. d, 1H, *J*=18 Hz); 5.79 (ddt, 1H, *J*=10, 18, 7 Hz). Found C, 75.4; H, 10.9. Calc. for C22H38O3; C, 74.7; H, 10.8%.

**Pentafluorophenyl acetate**. ( 83%). 1H NMR (300 MHz): 2.39 (s). Permyakov, E. A.; Permyakov, S. E.; Medvedkin, V. N. *Russ. J. Bioorg. Chem.* **2002**, 28, 9-13.

**Pentachlorophenyl acetate**. (91%). 1H NMR (300 MHz): 2.41 (s). Kanaoka, Y.; Tanizawa, K.; Sato, E.; Yonemitsu, O.; Ban, Y. *Chem. Pharm. Bull.* **1967**, *15*, 593-595.

**4-Methoxyphenylacetate**. (69%). 1H NMR (300 MHz): 2.25 (s, 3H); 3.76 (s, 3H); 6.87, 6.89 (app. 2xd, *J*=9.6 Hz, 4H). Glatzhofer, D. T.; Roy, R. R.; Cossey, K. N. *Org. Lett*. **2002**, *4*, 2349-2352.

#
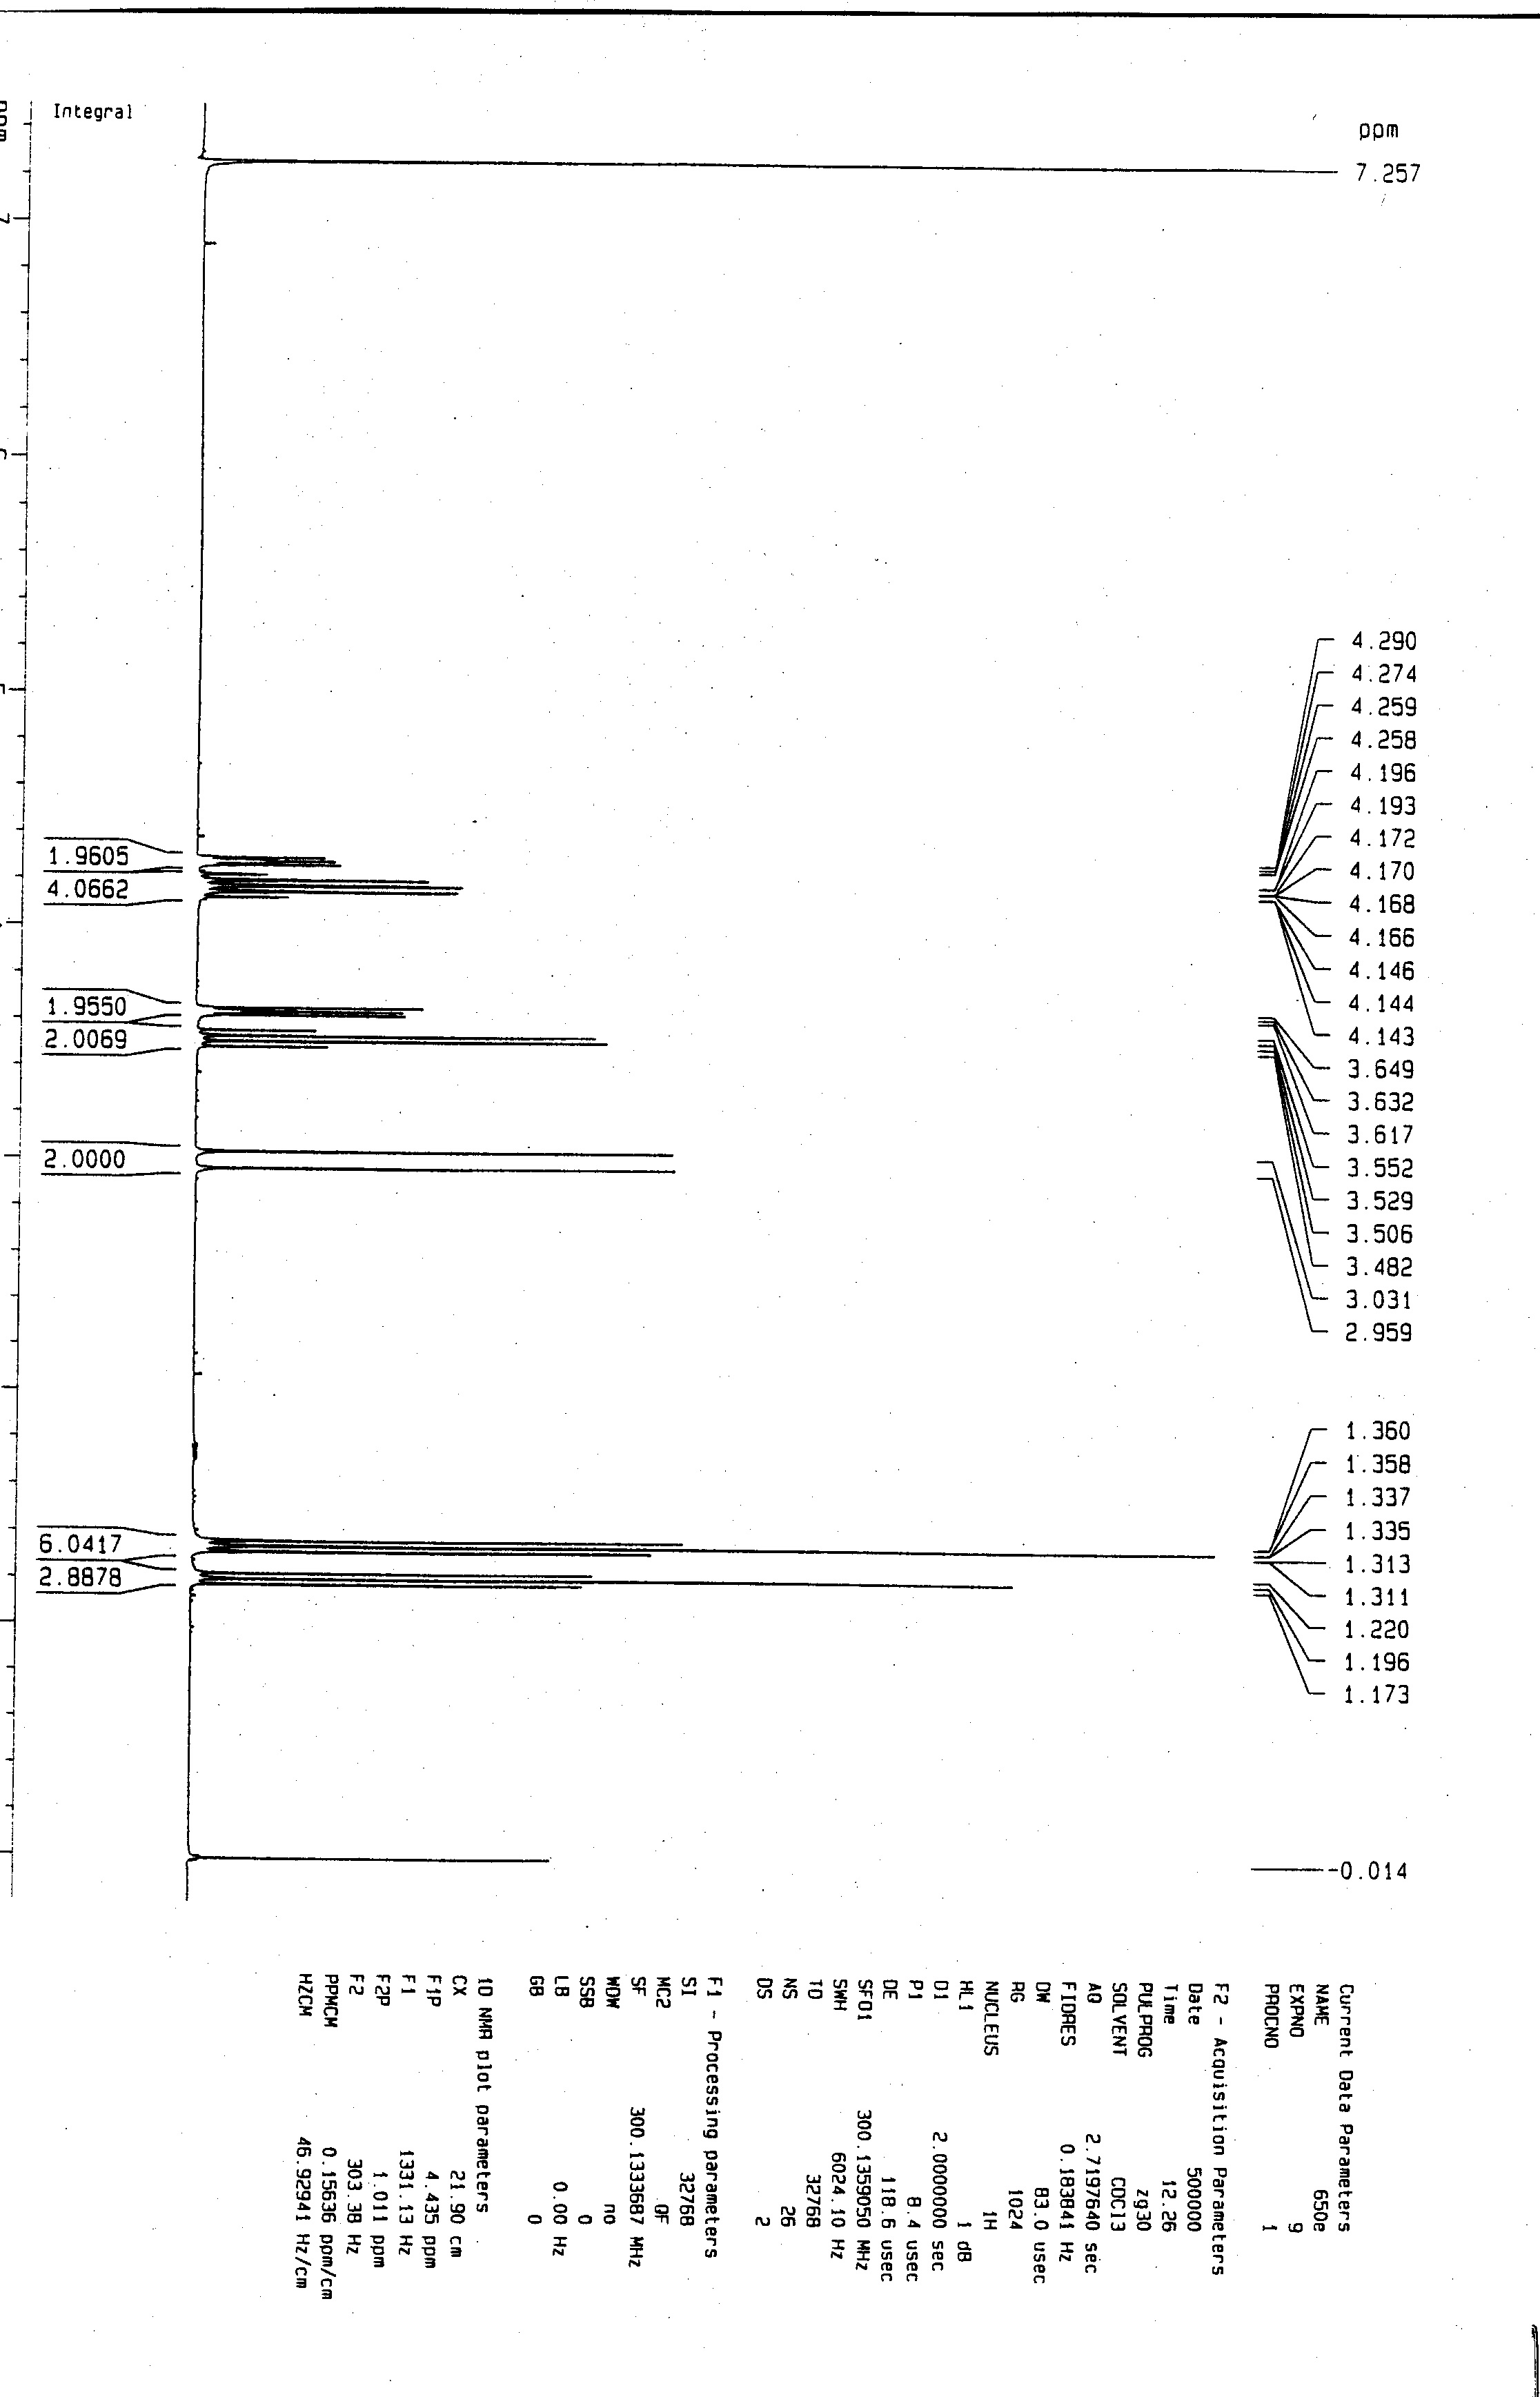


#
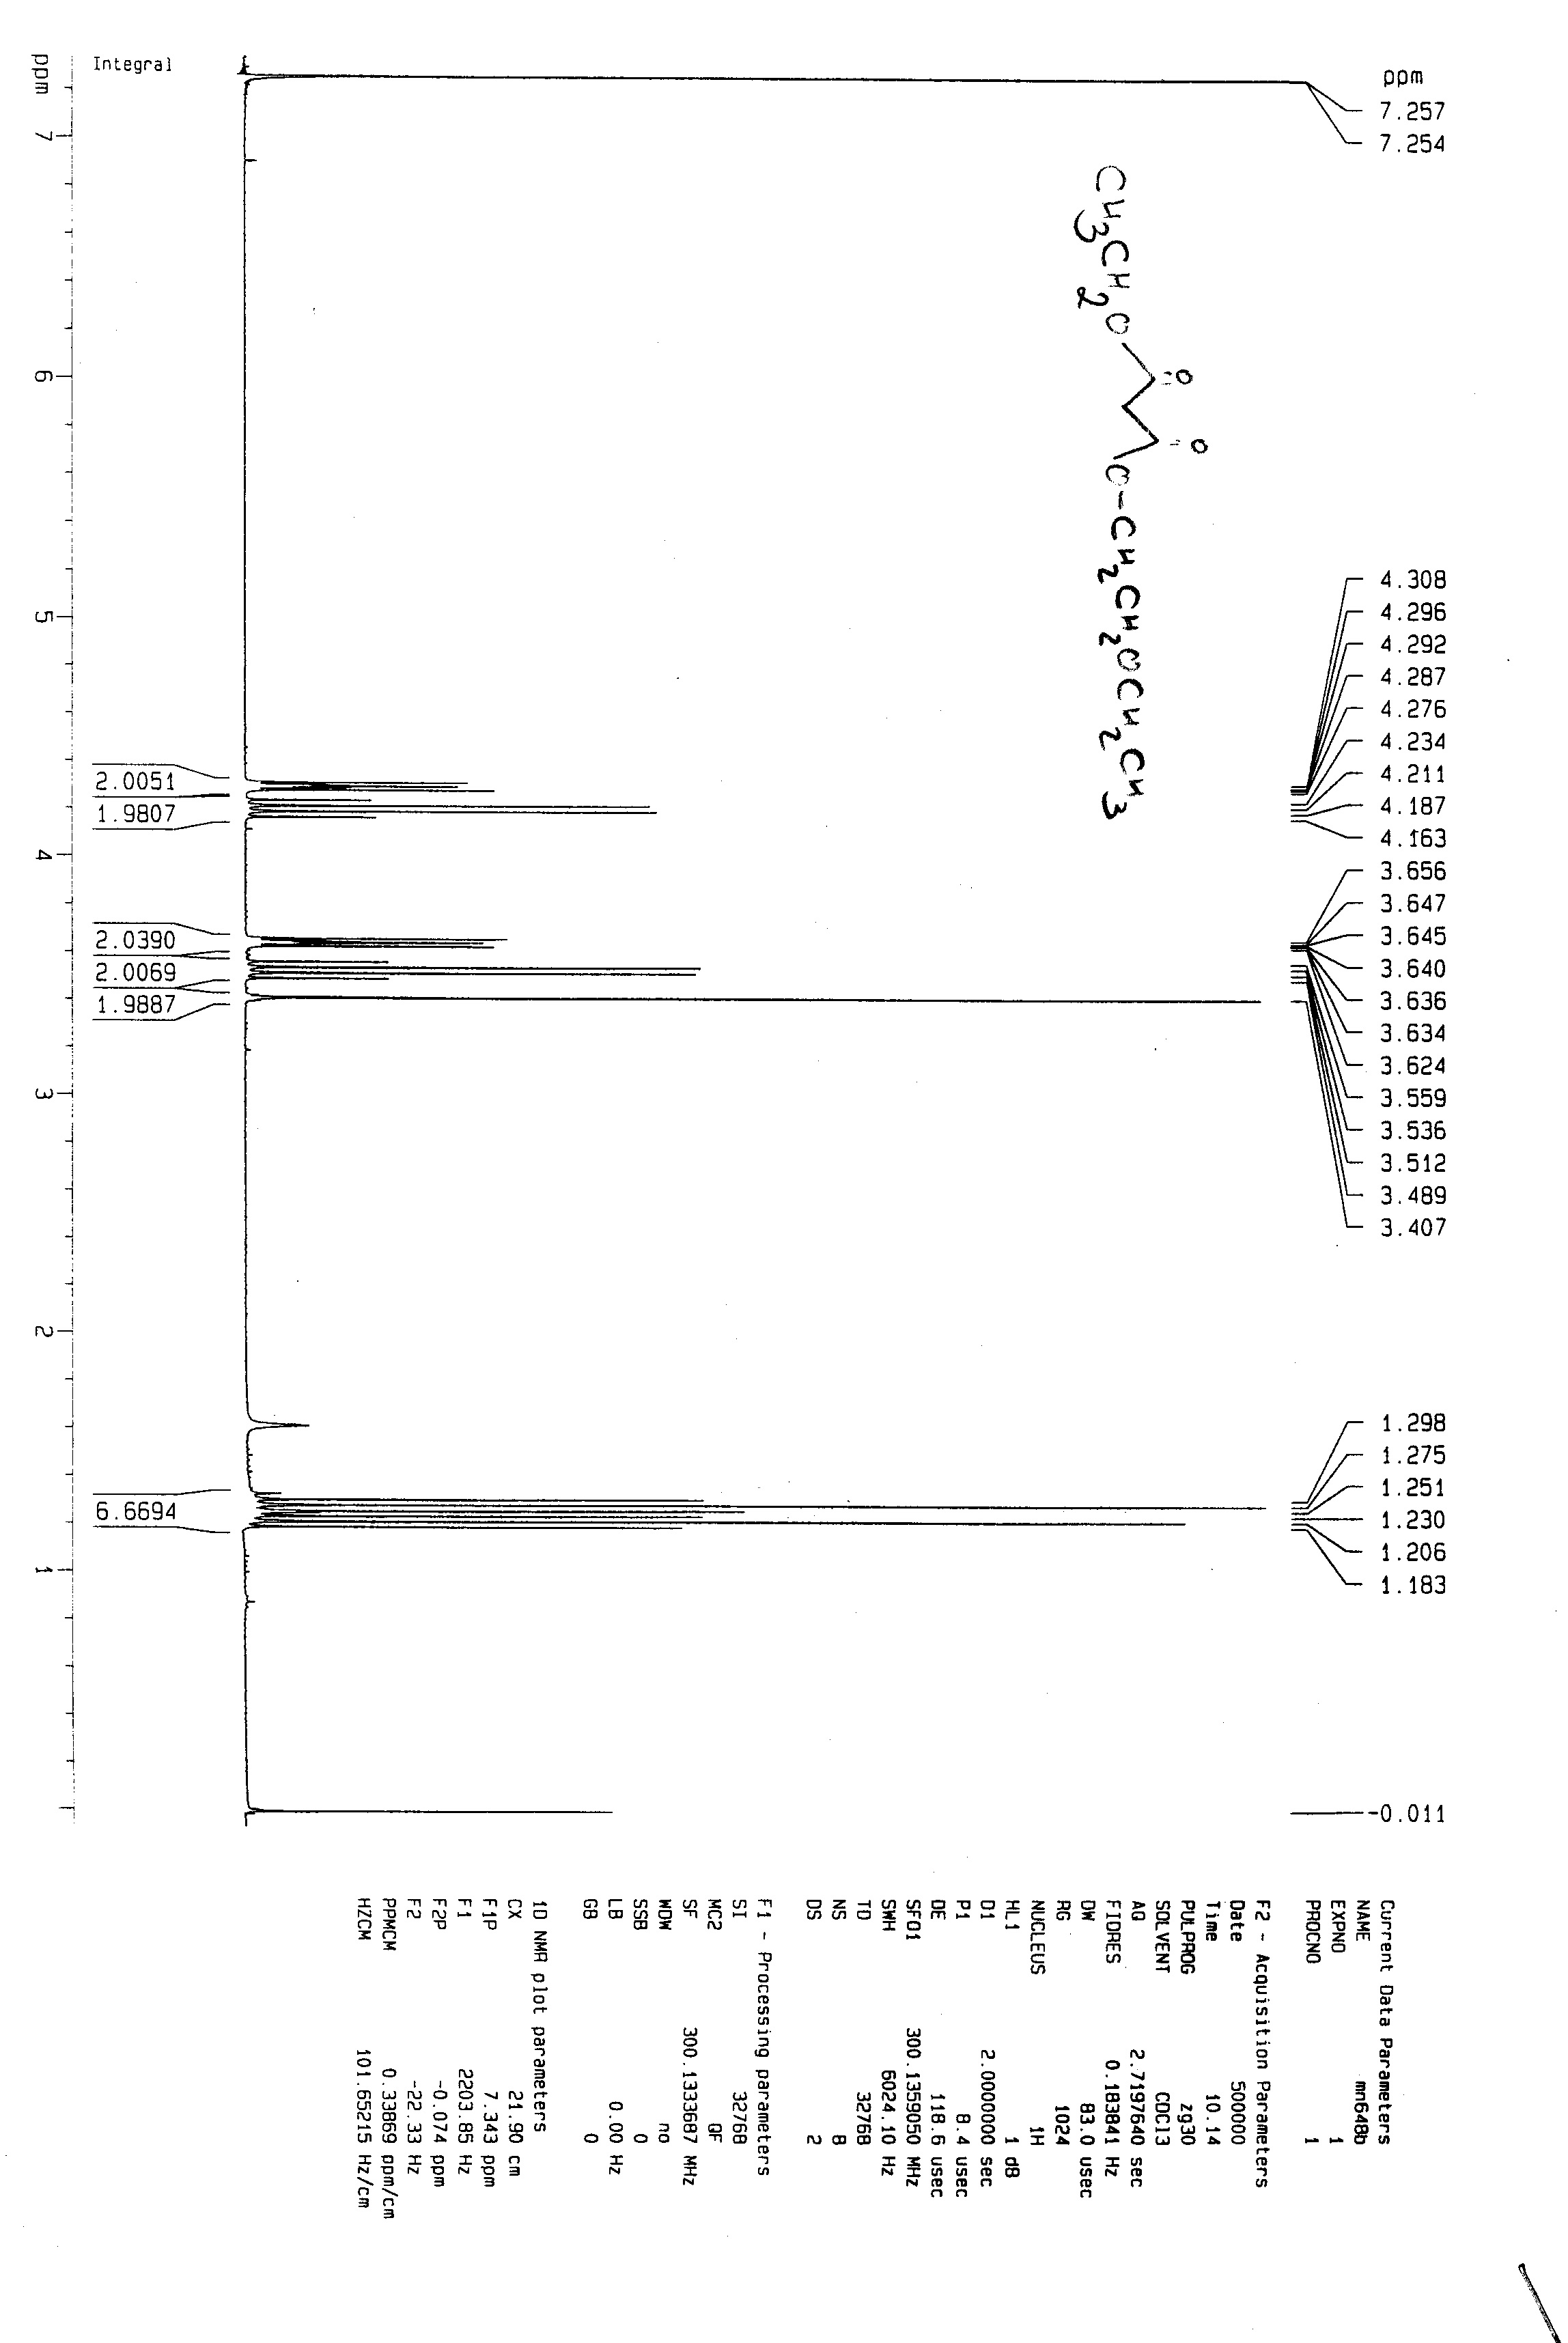


#
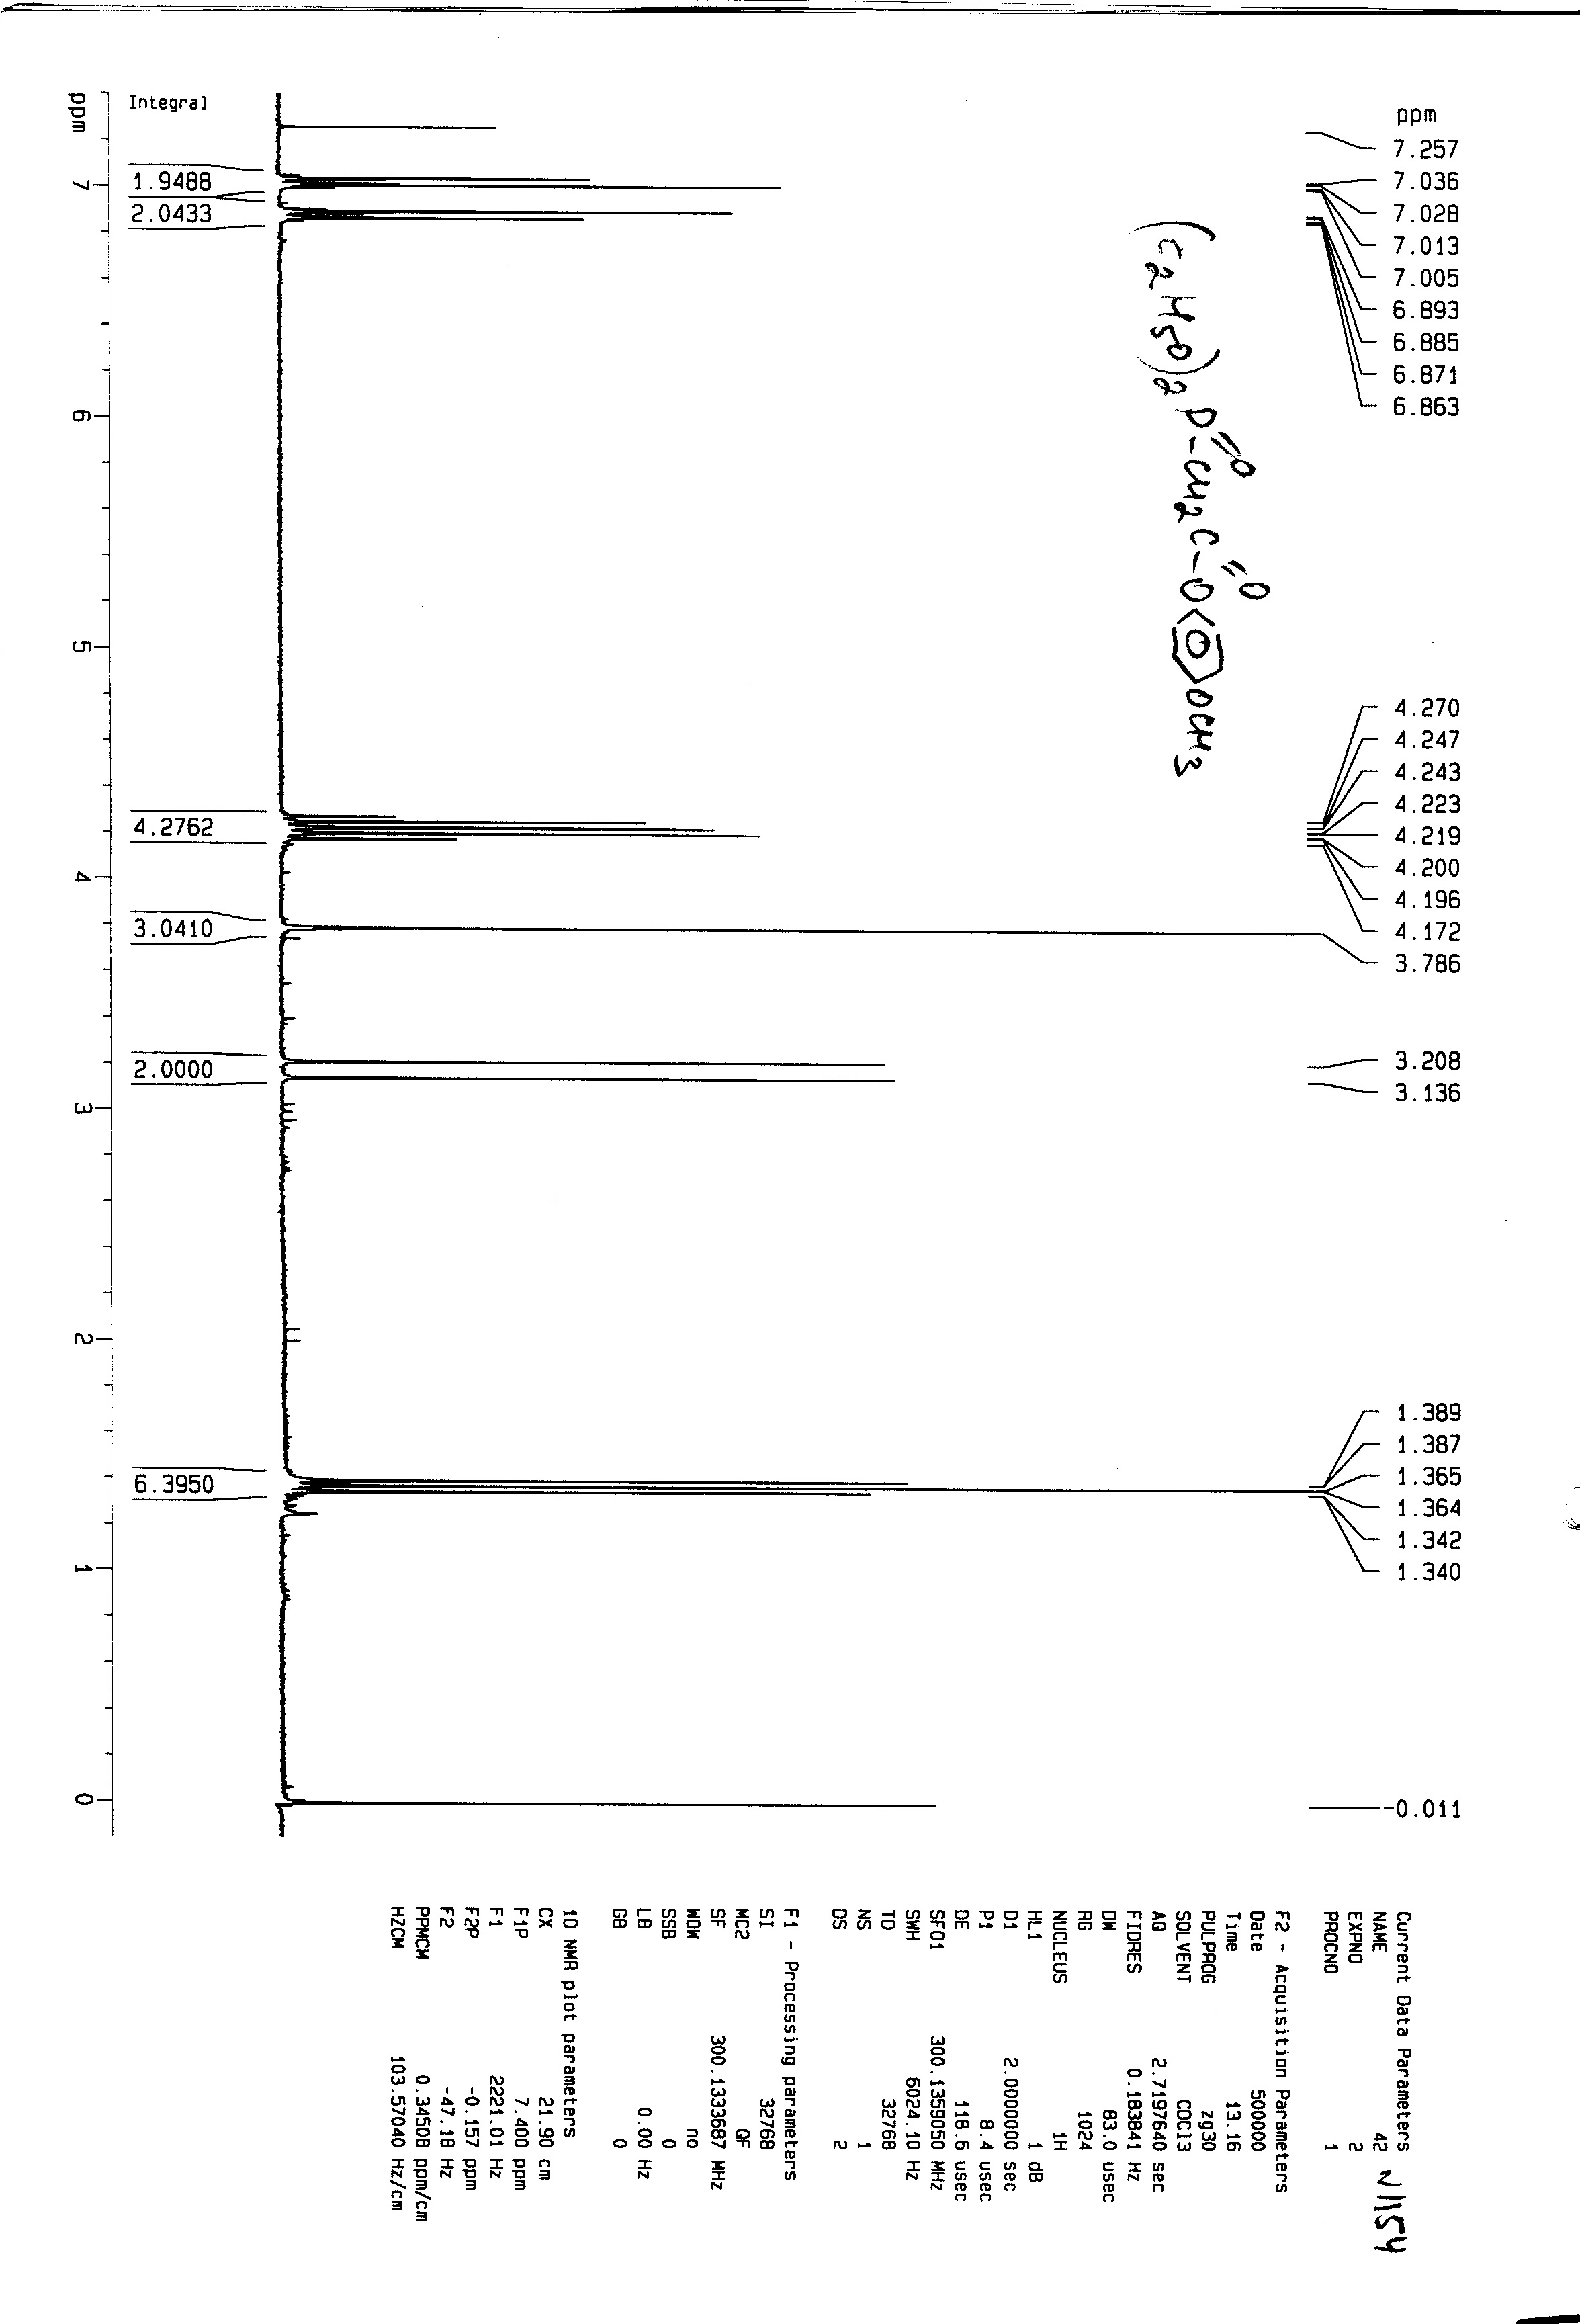


#

#


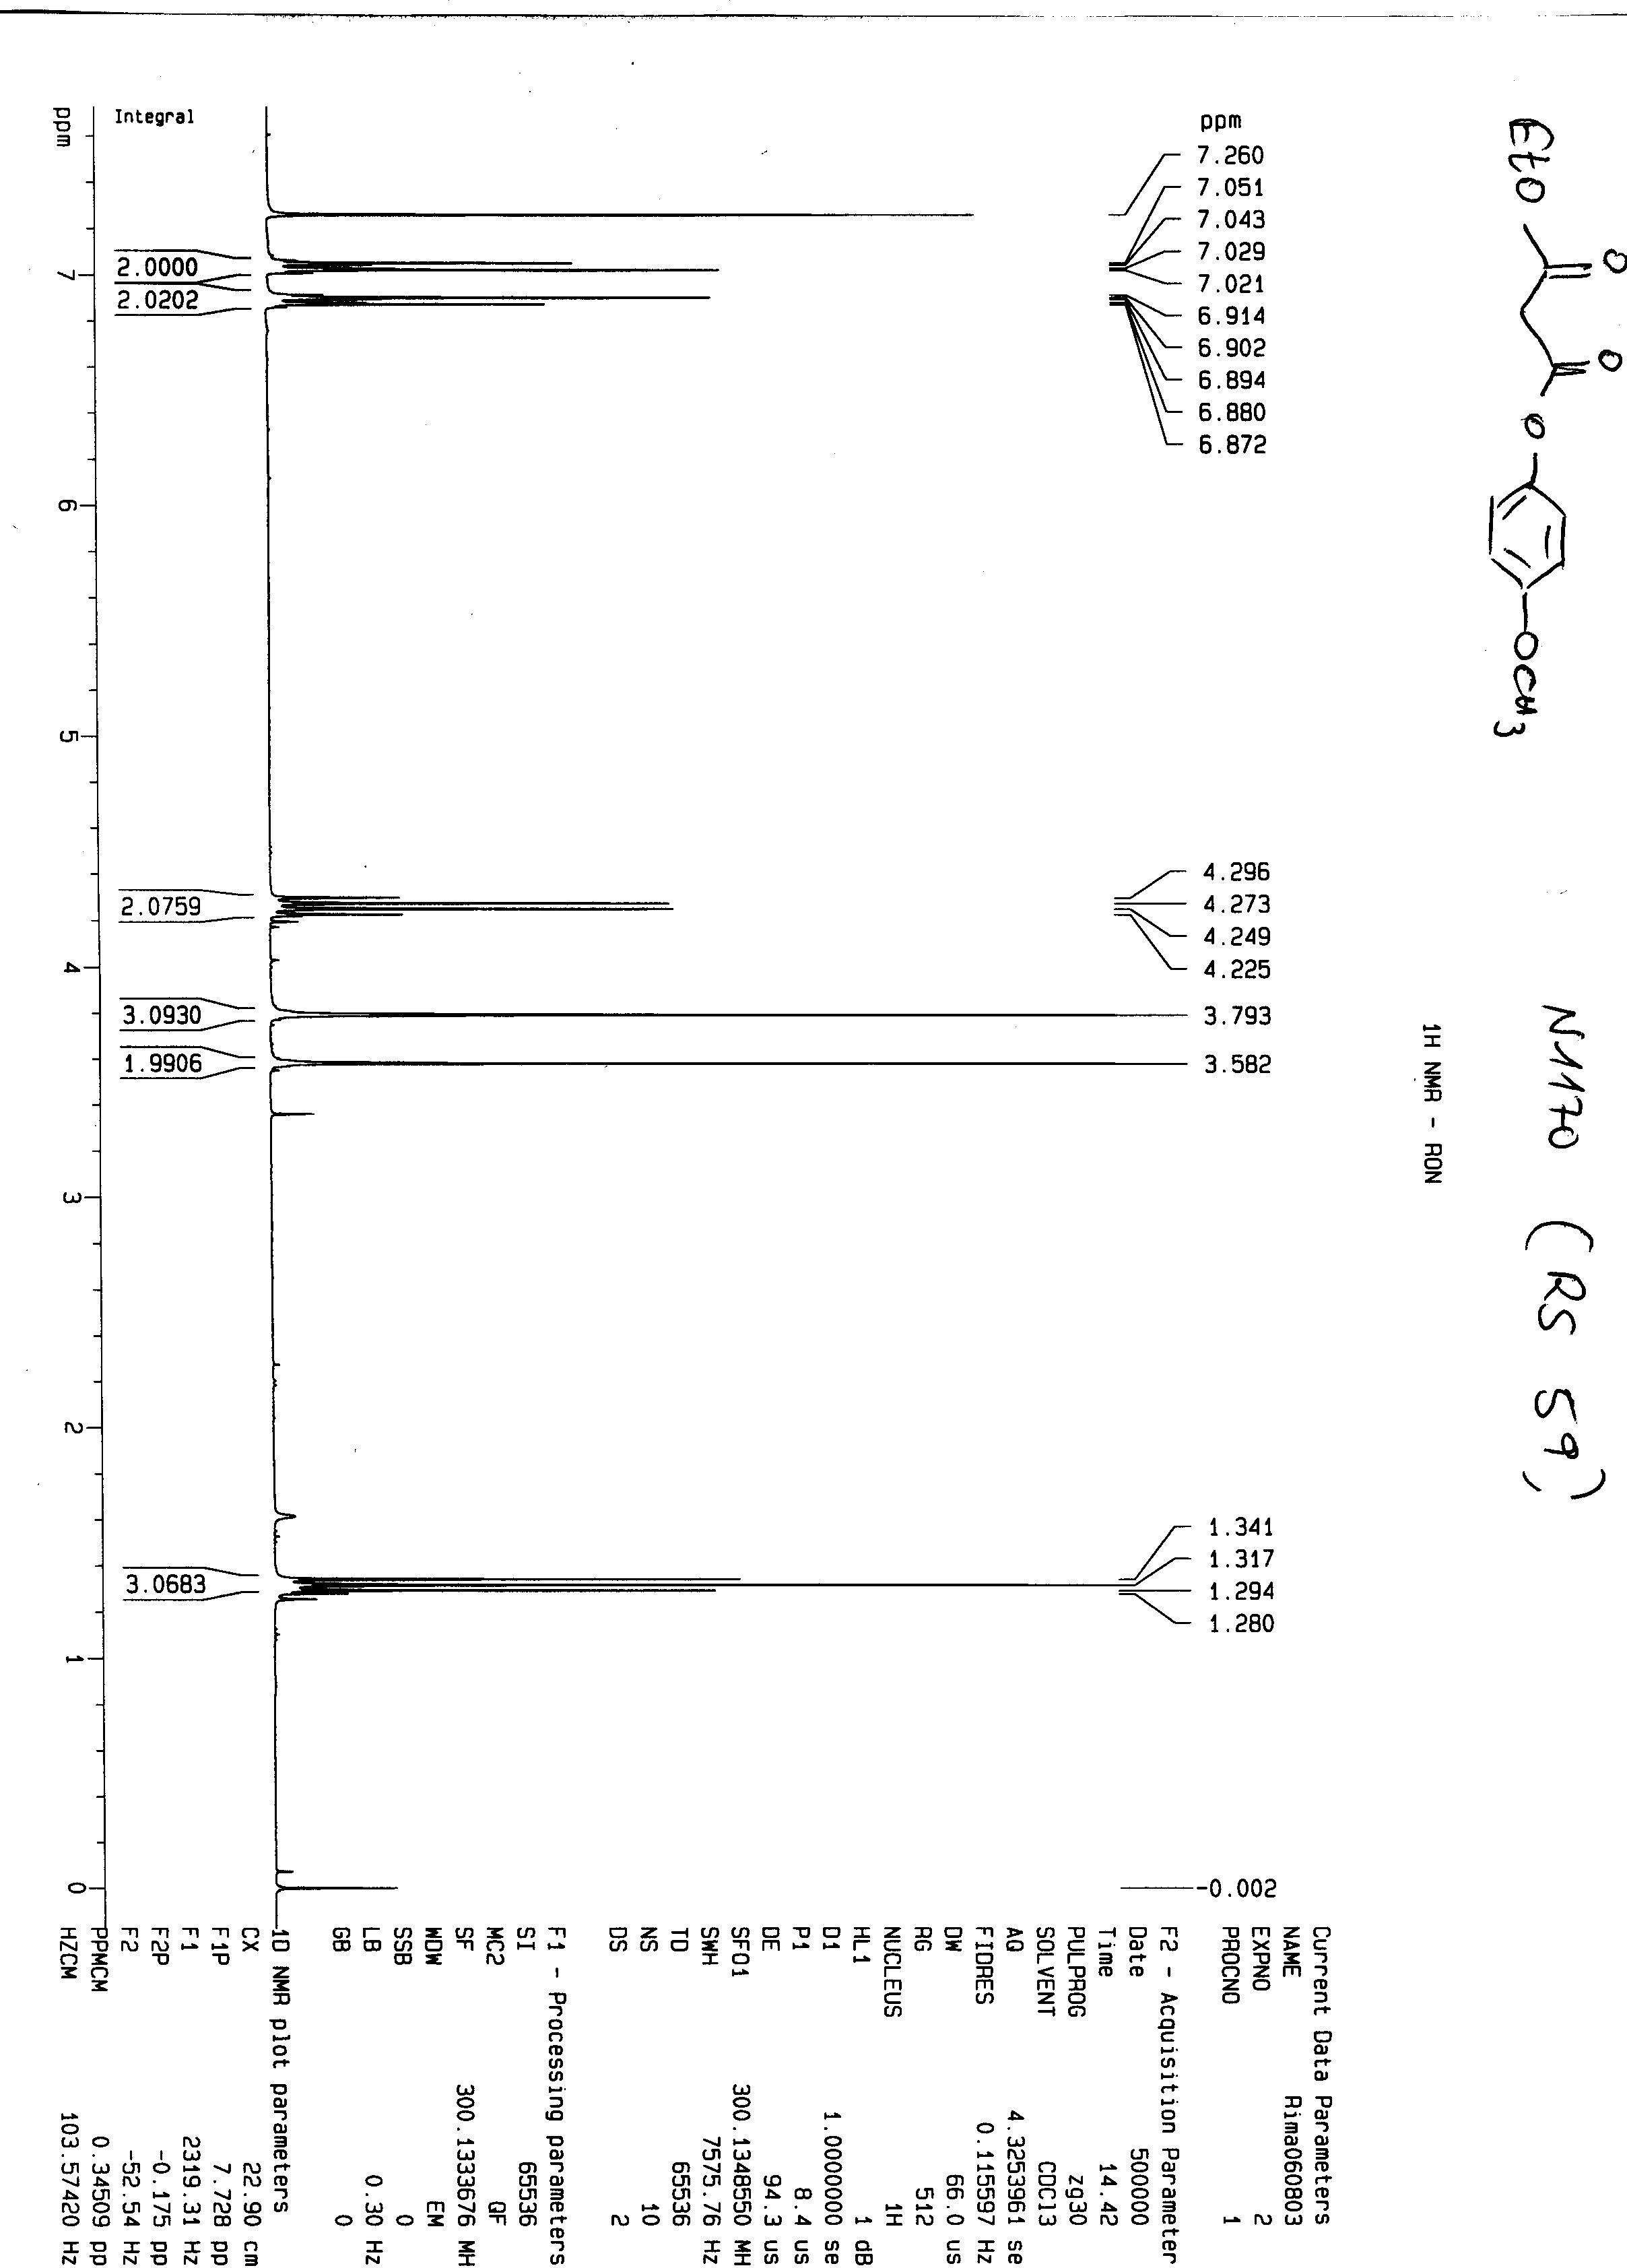


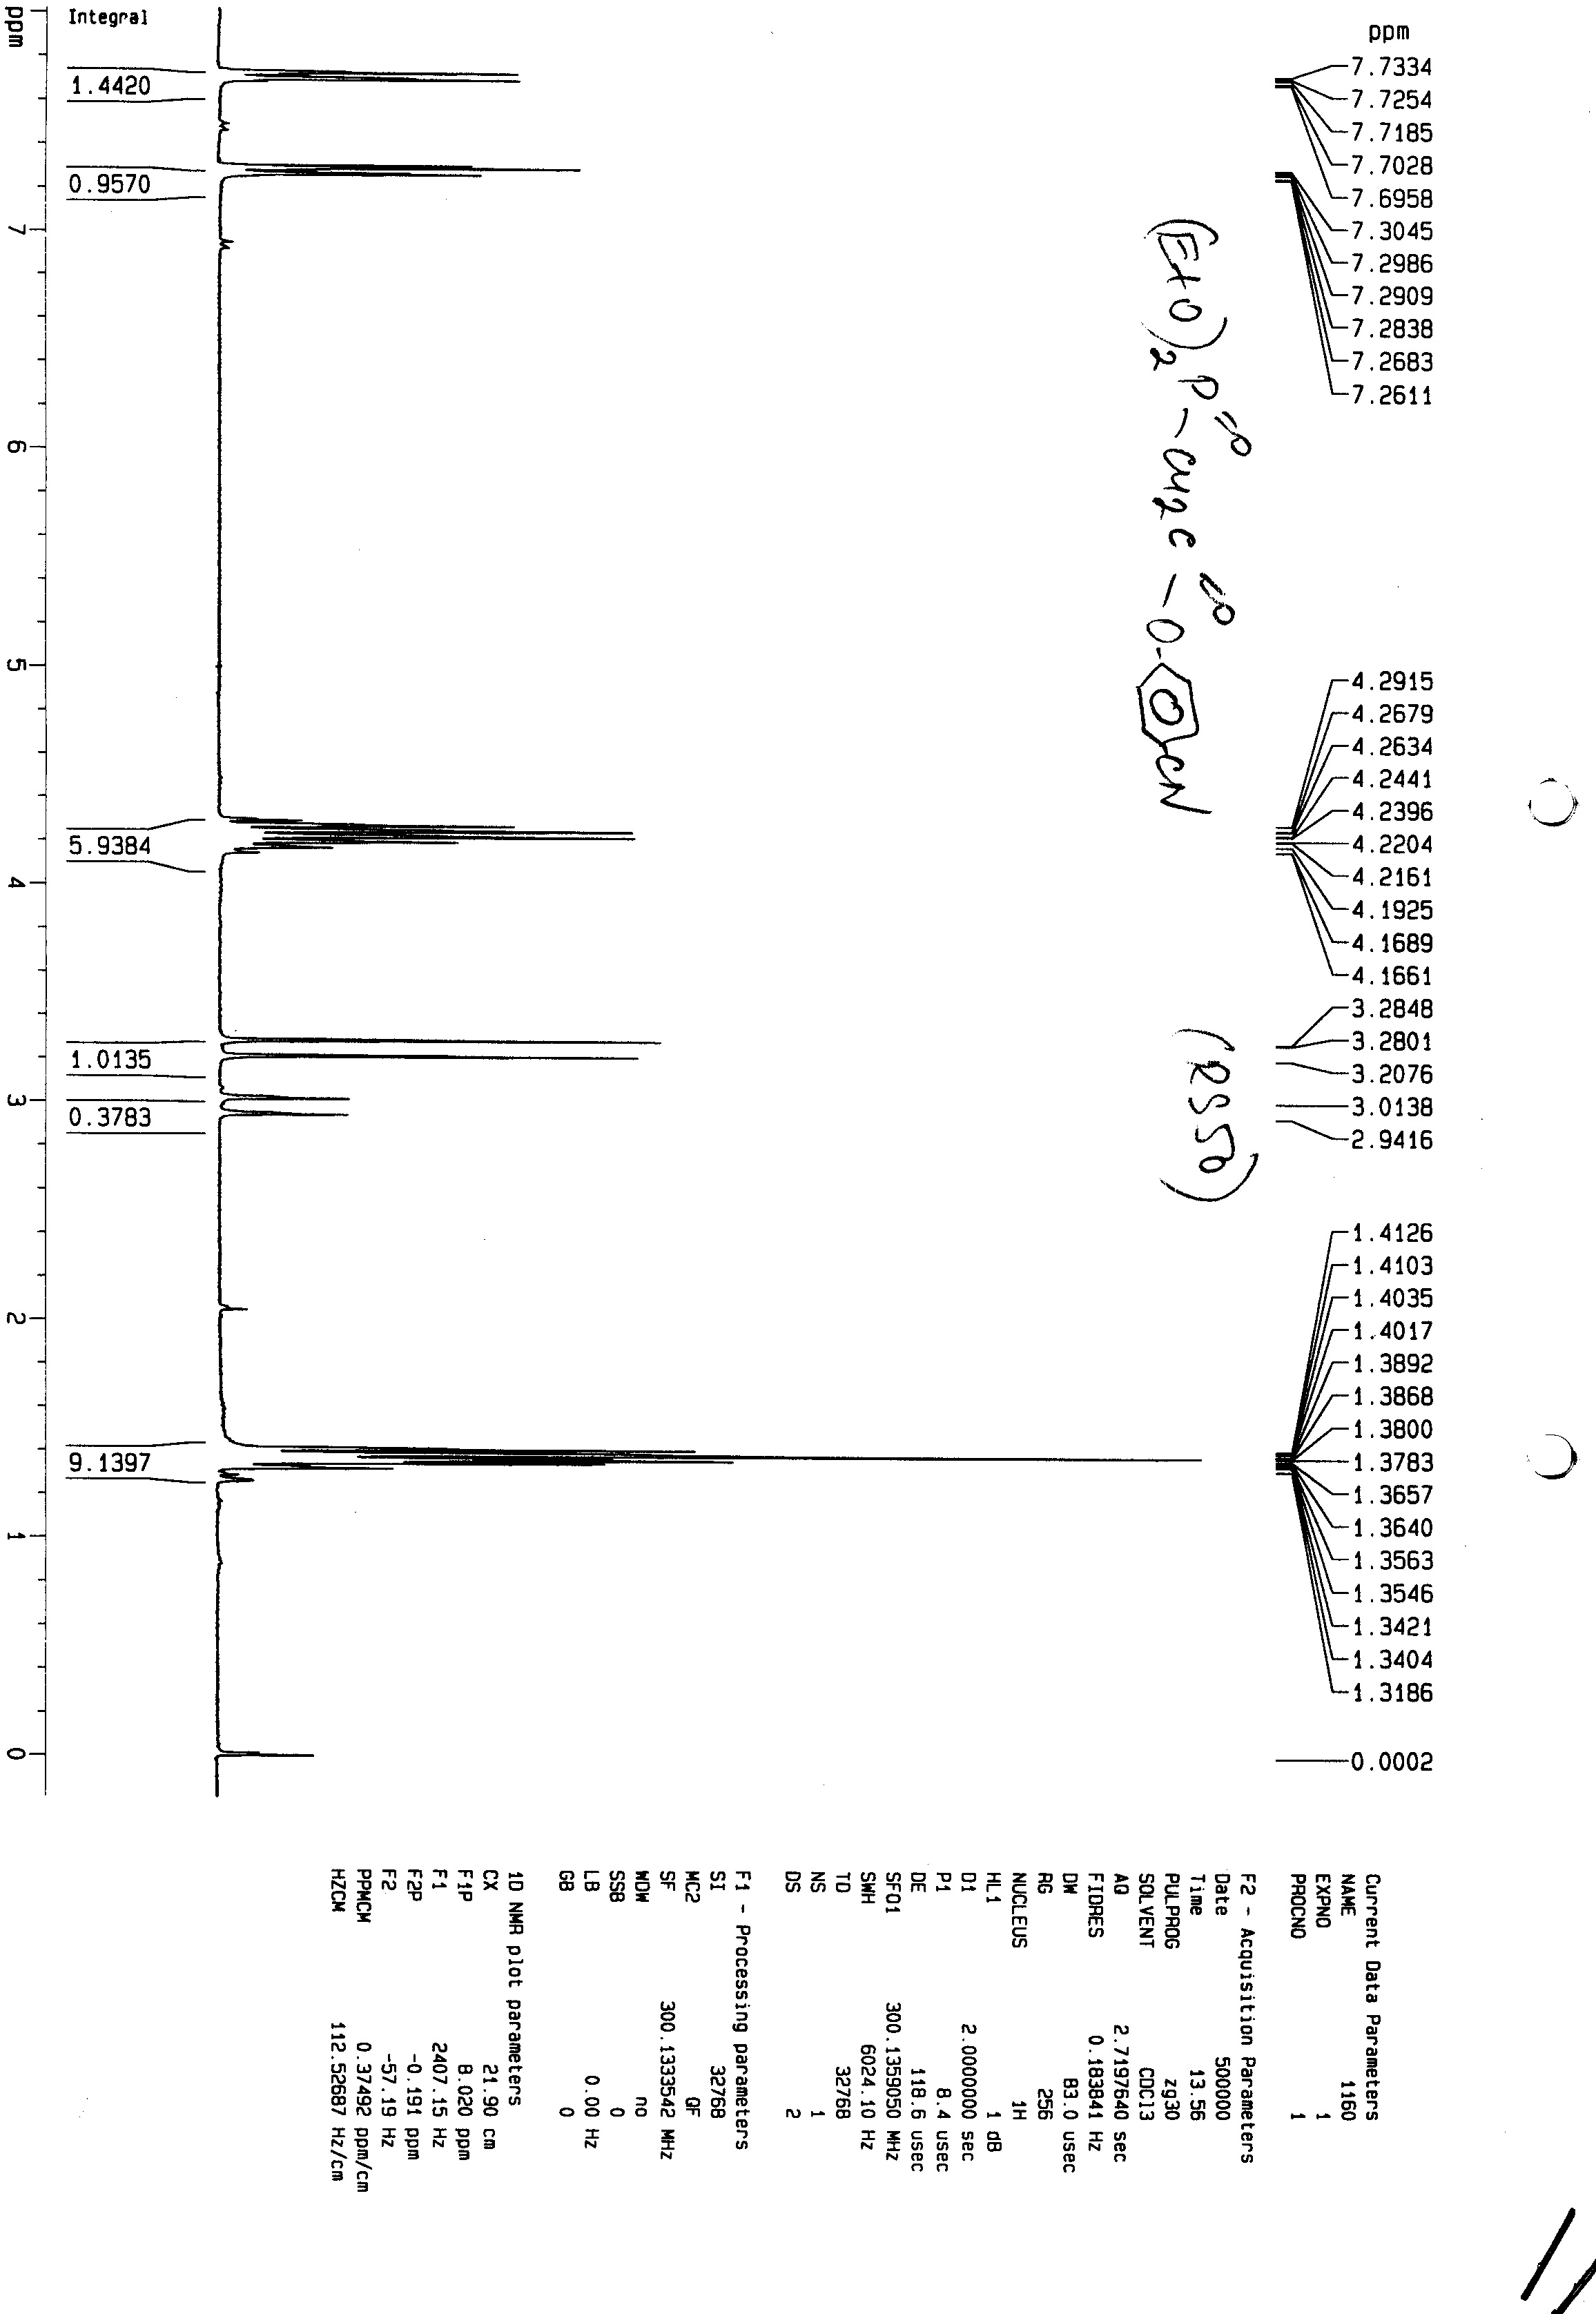


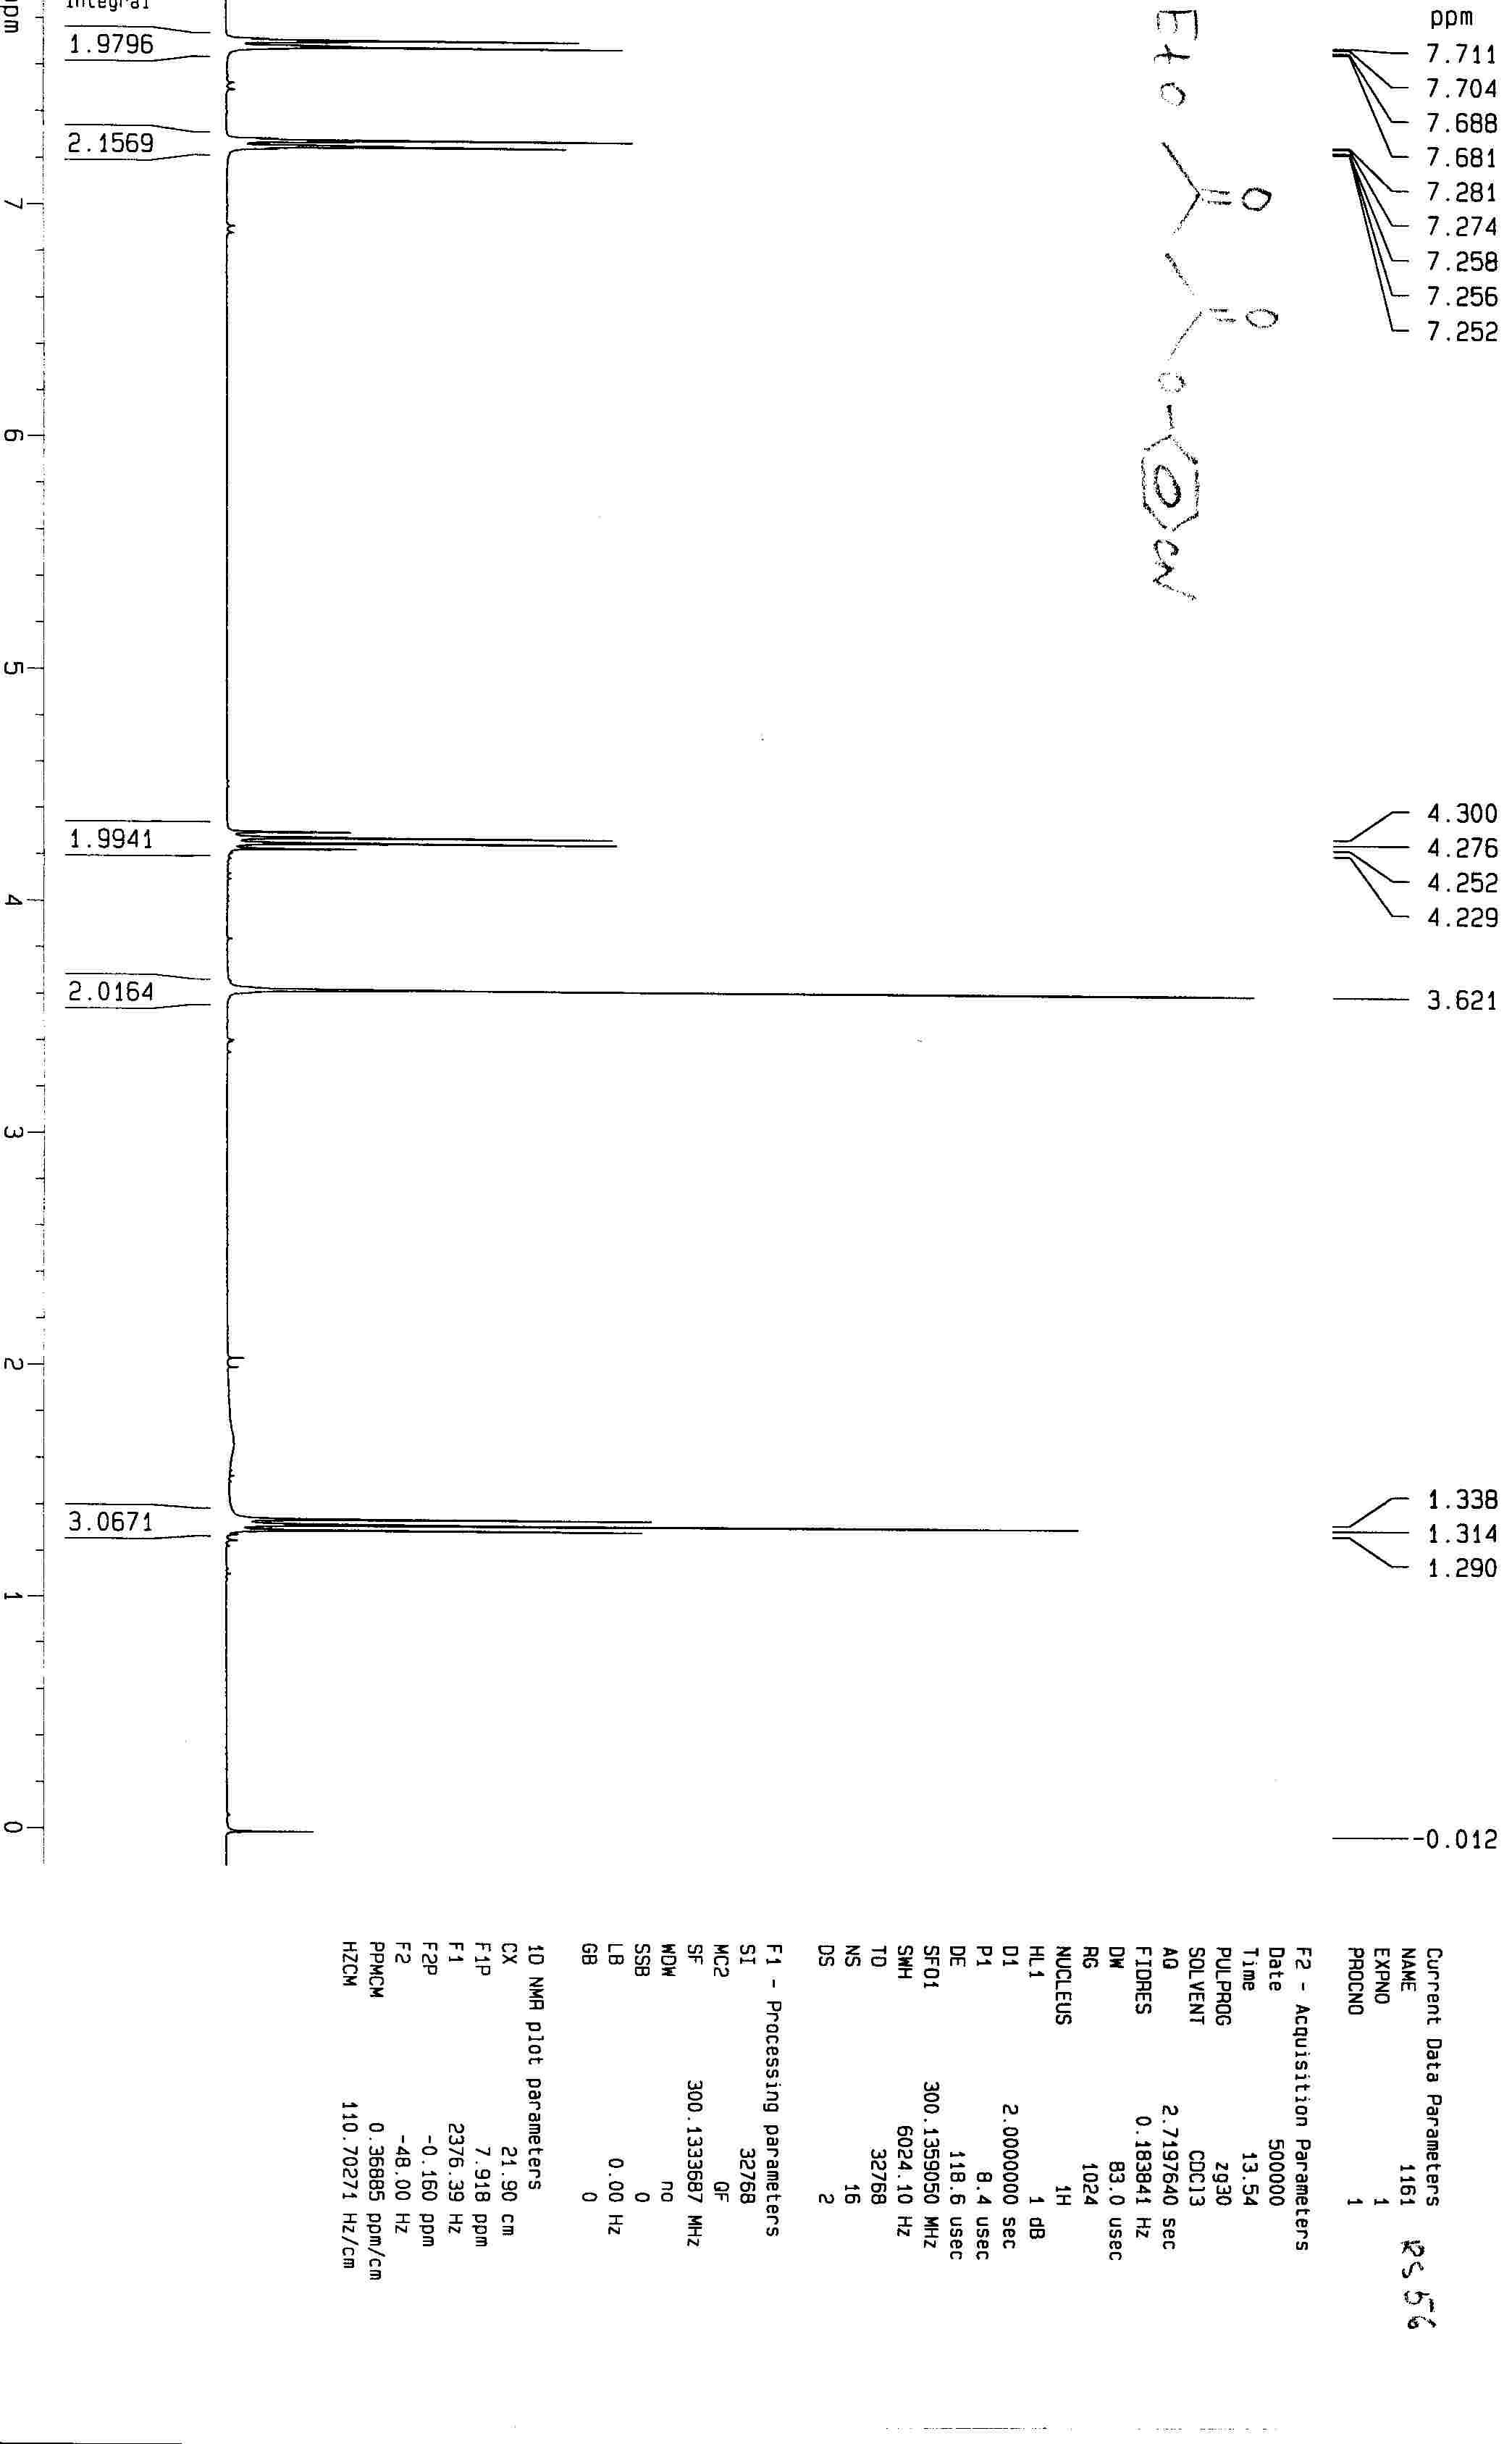


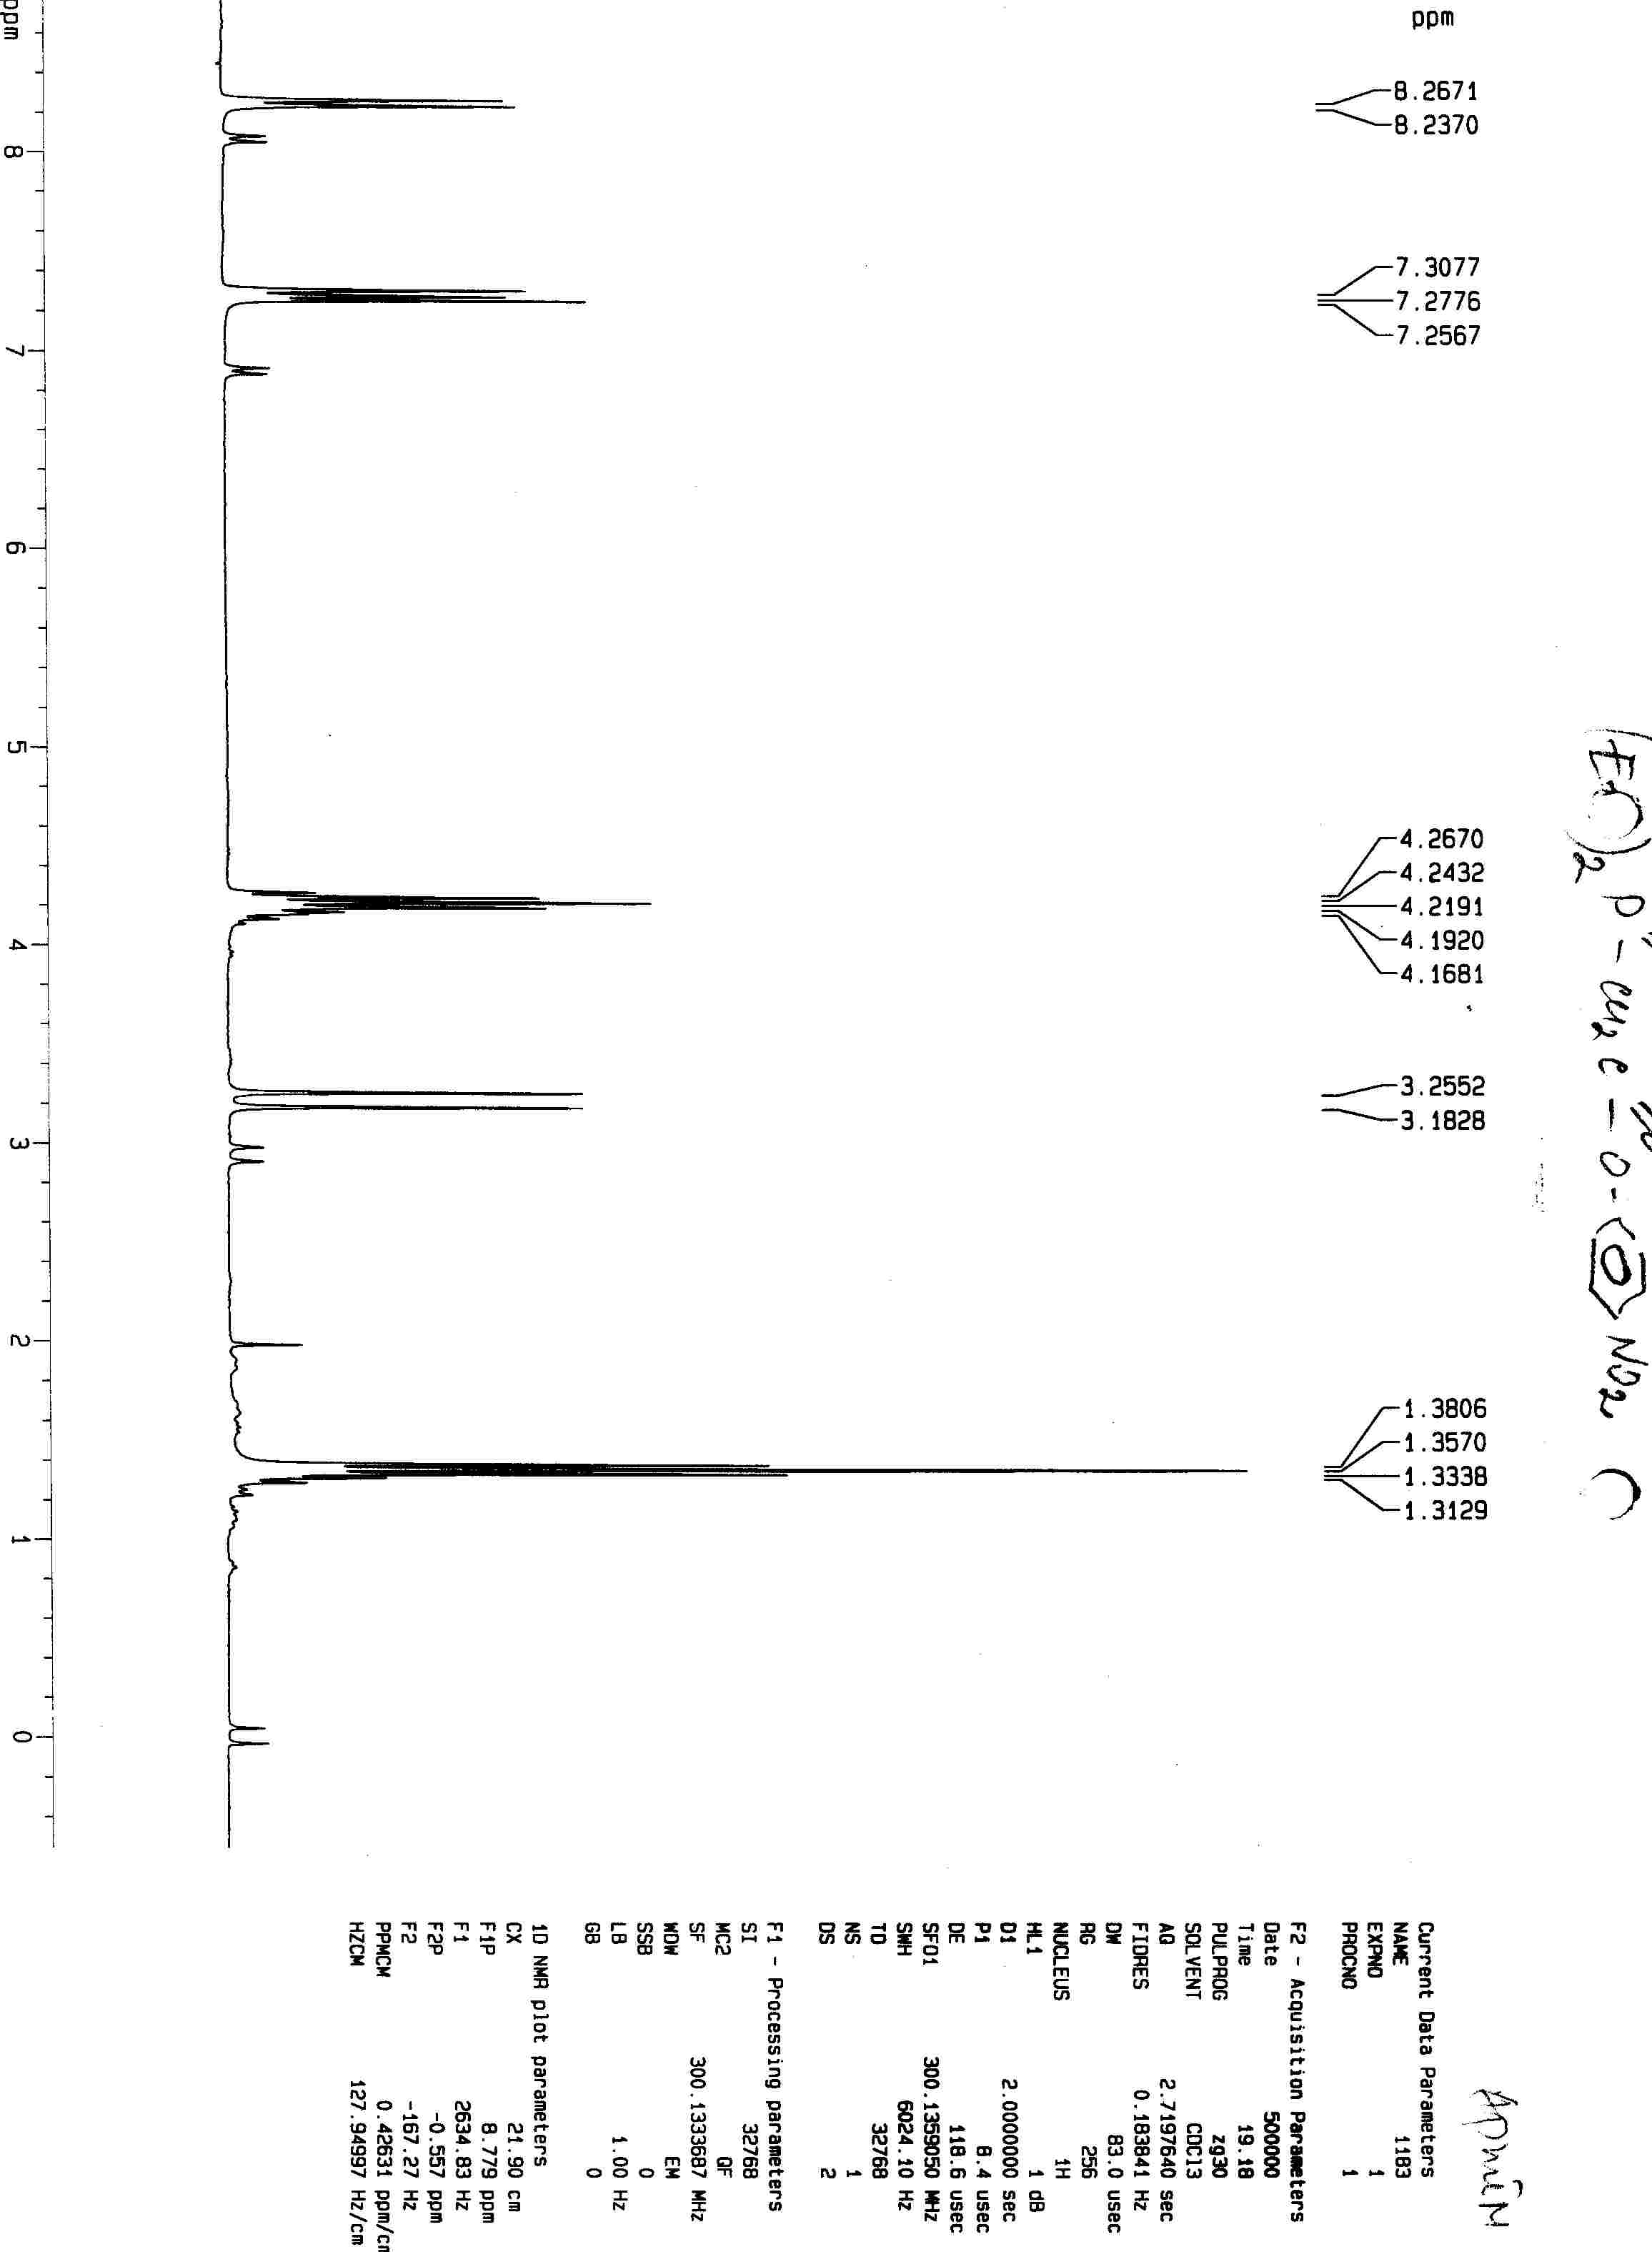


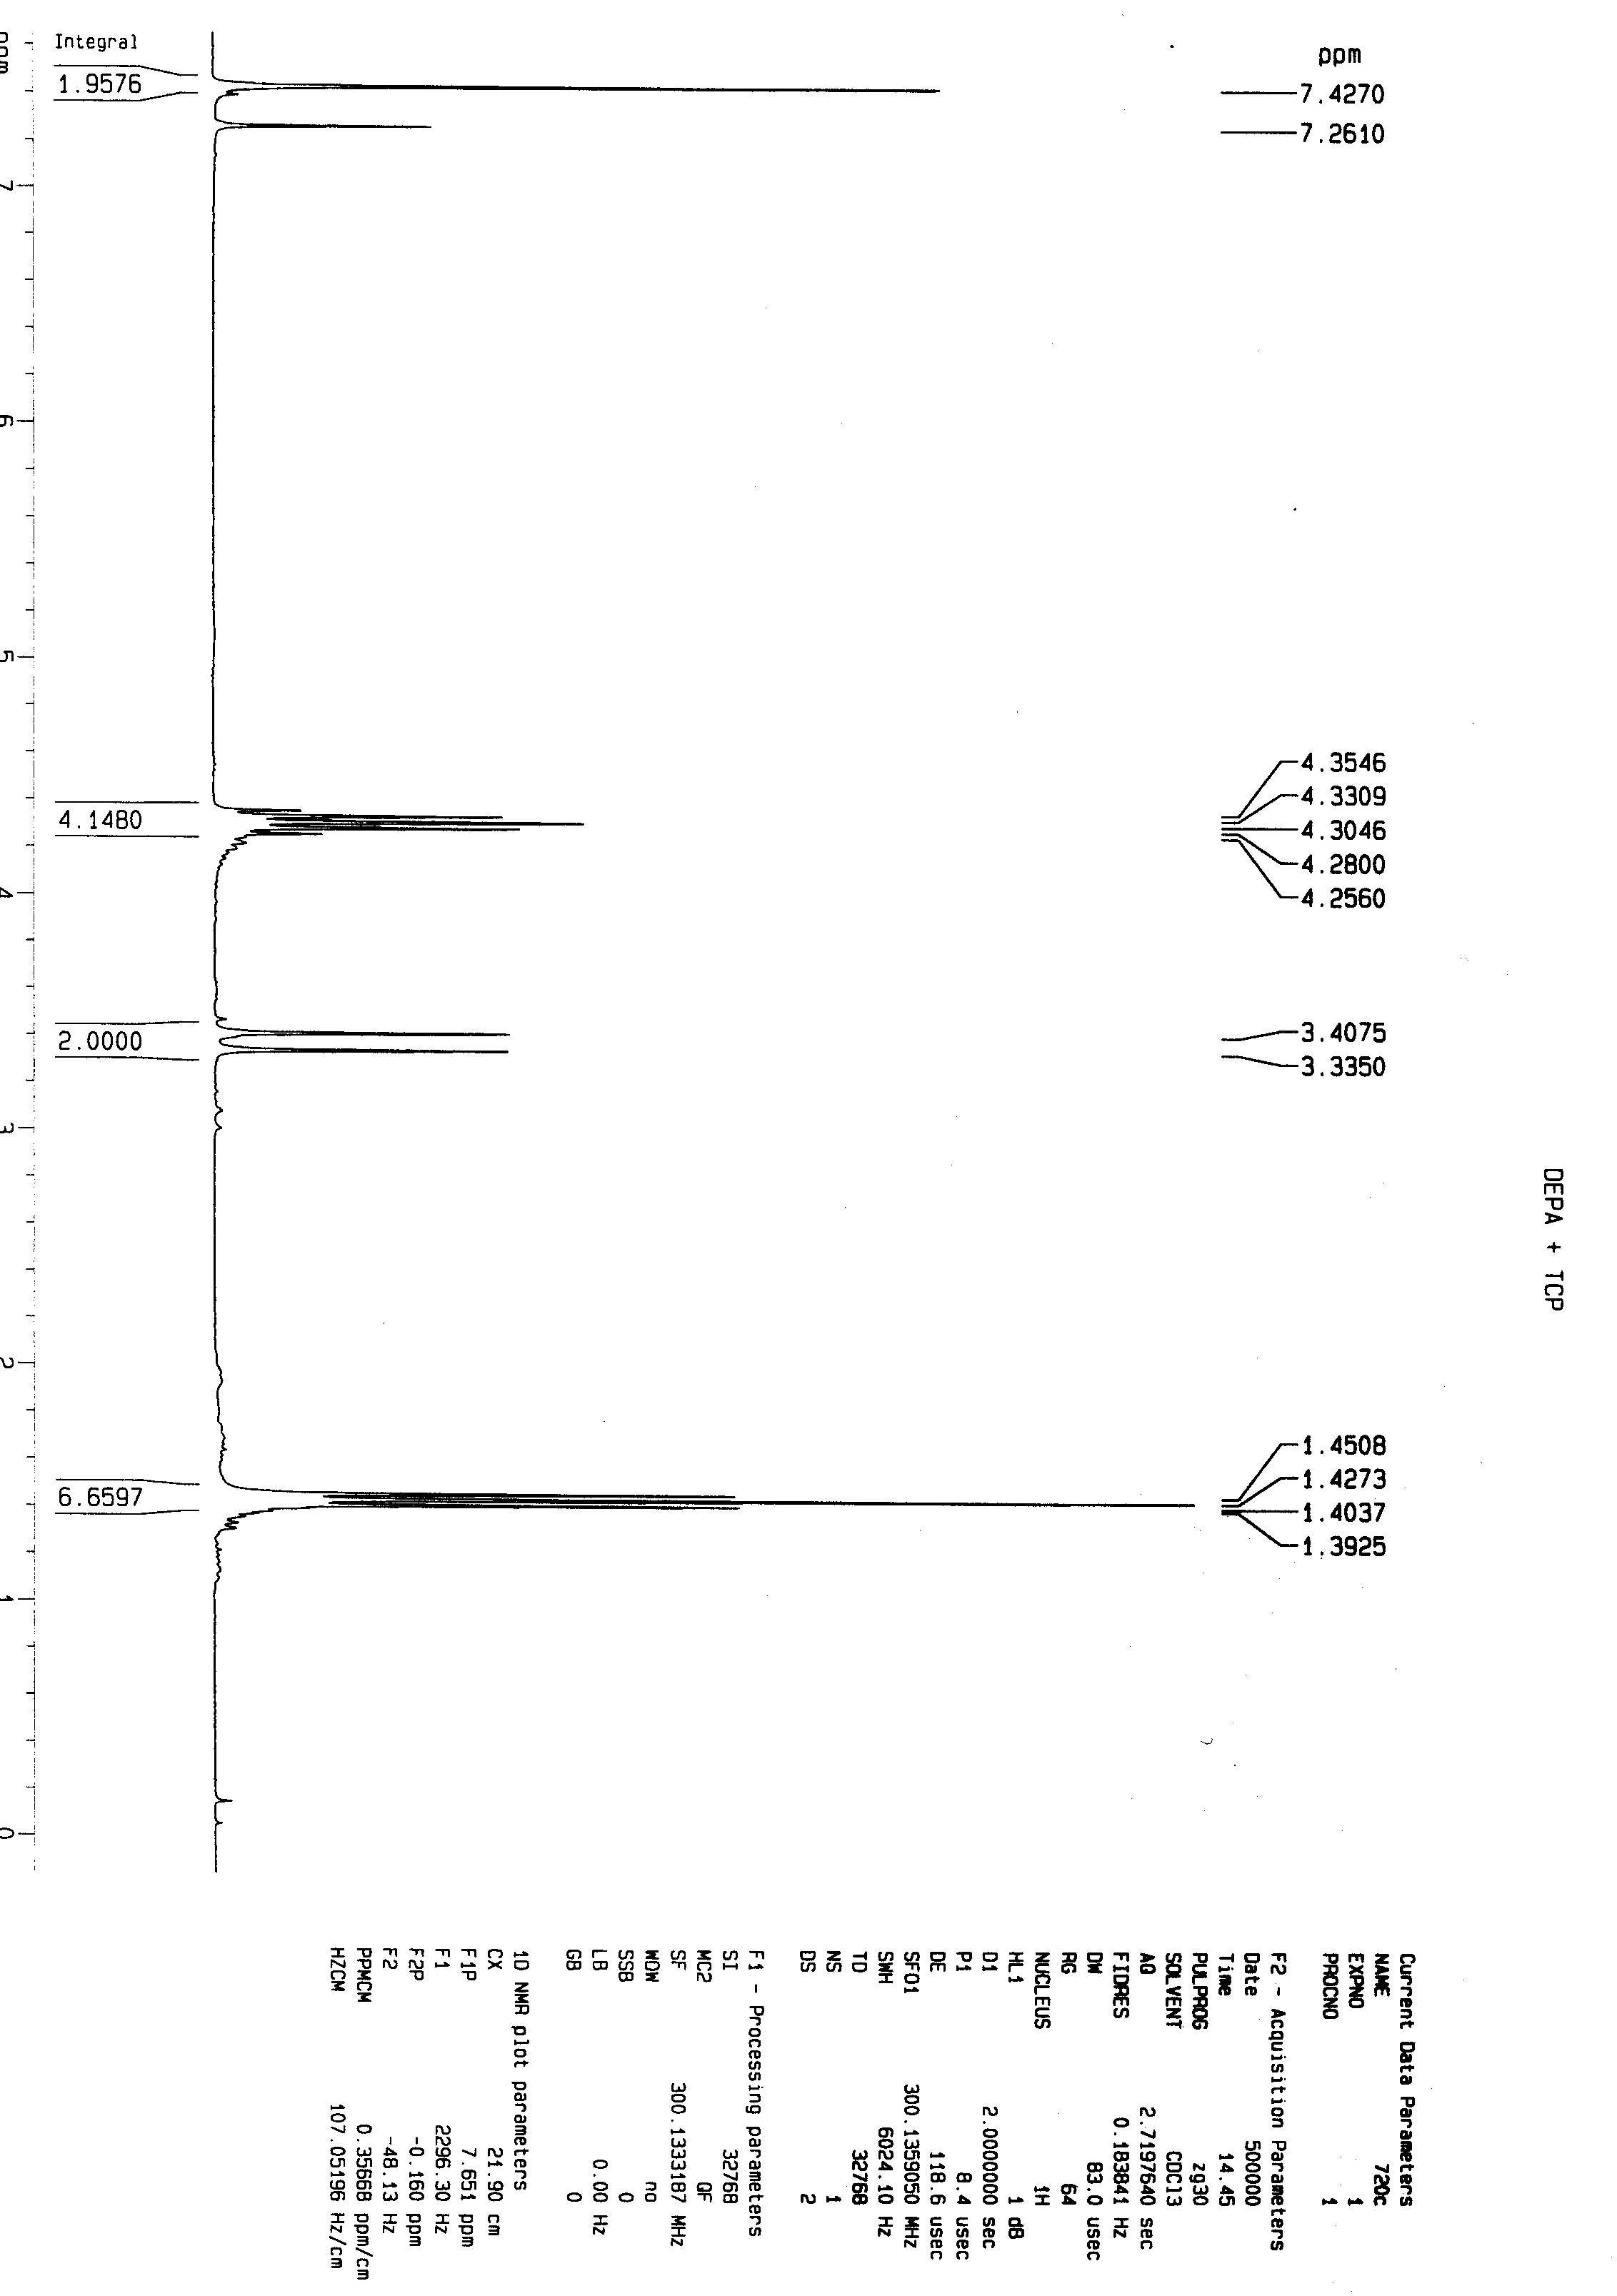


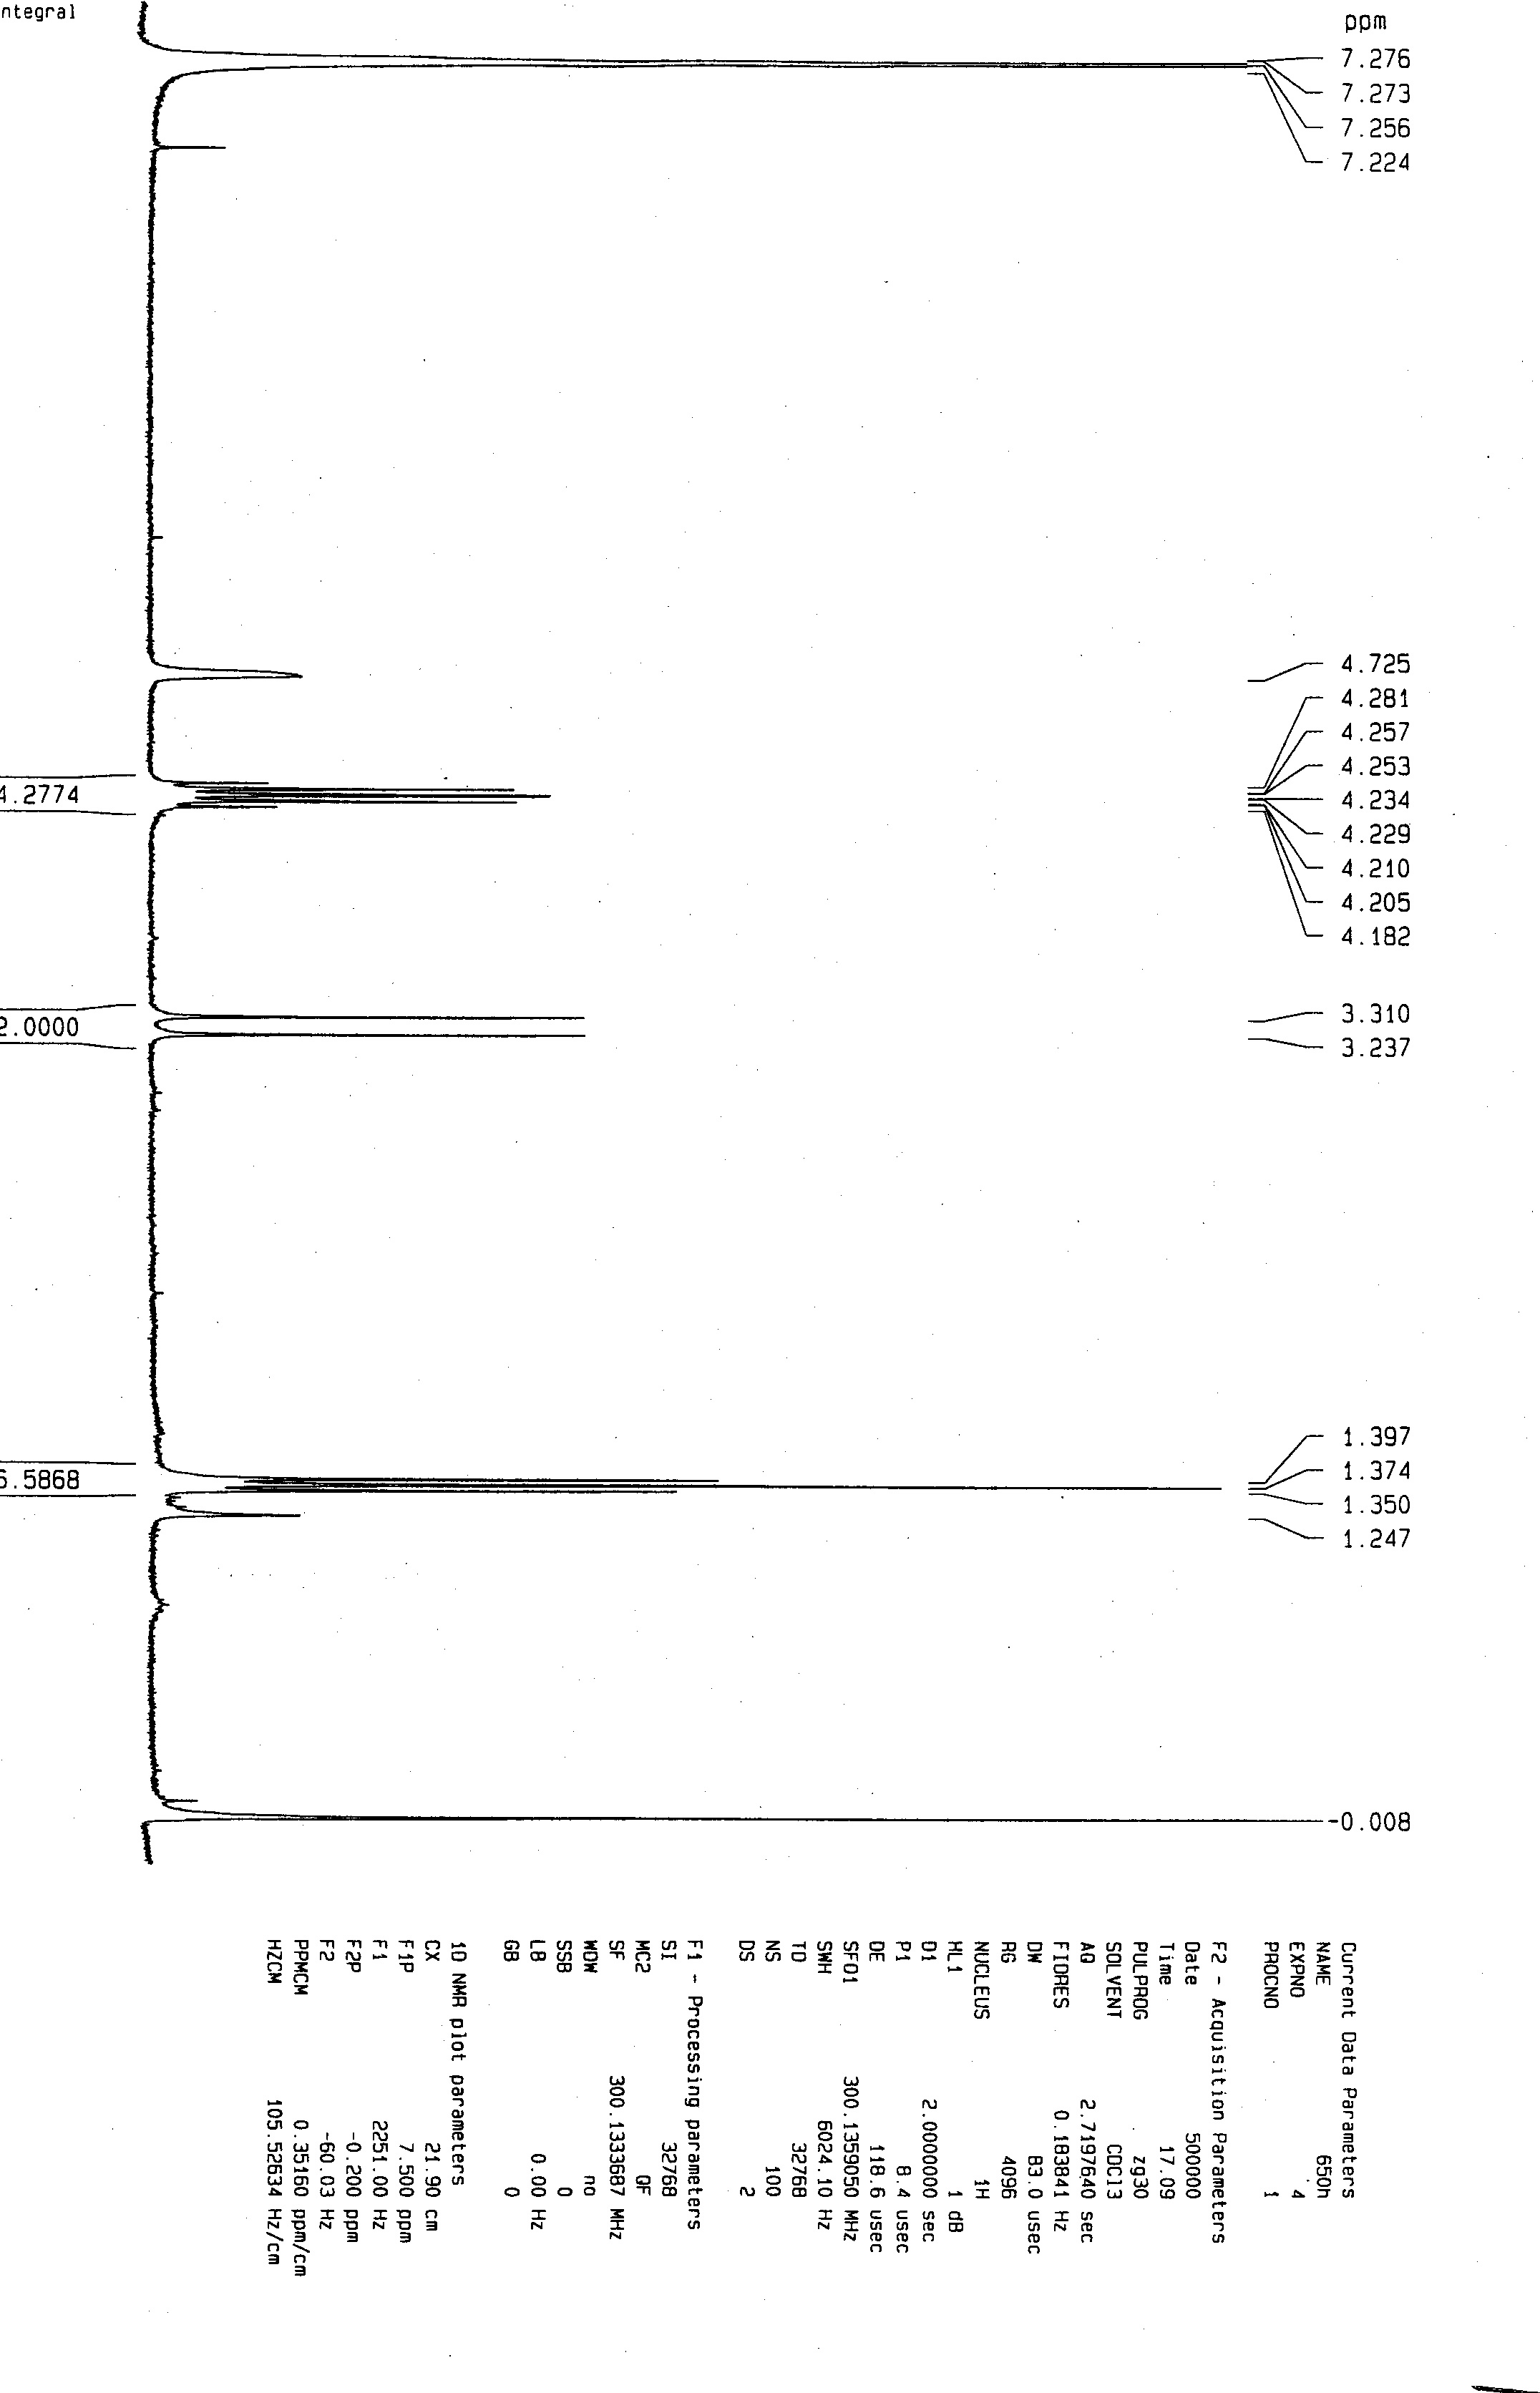


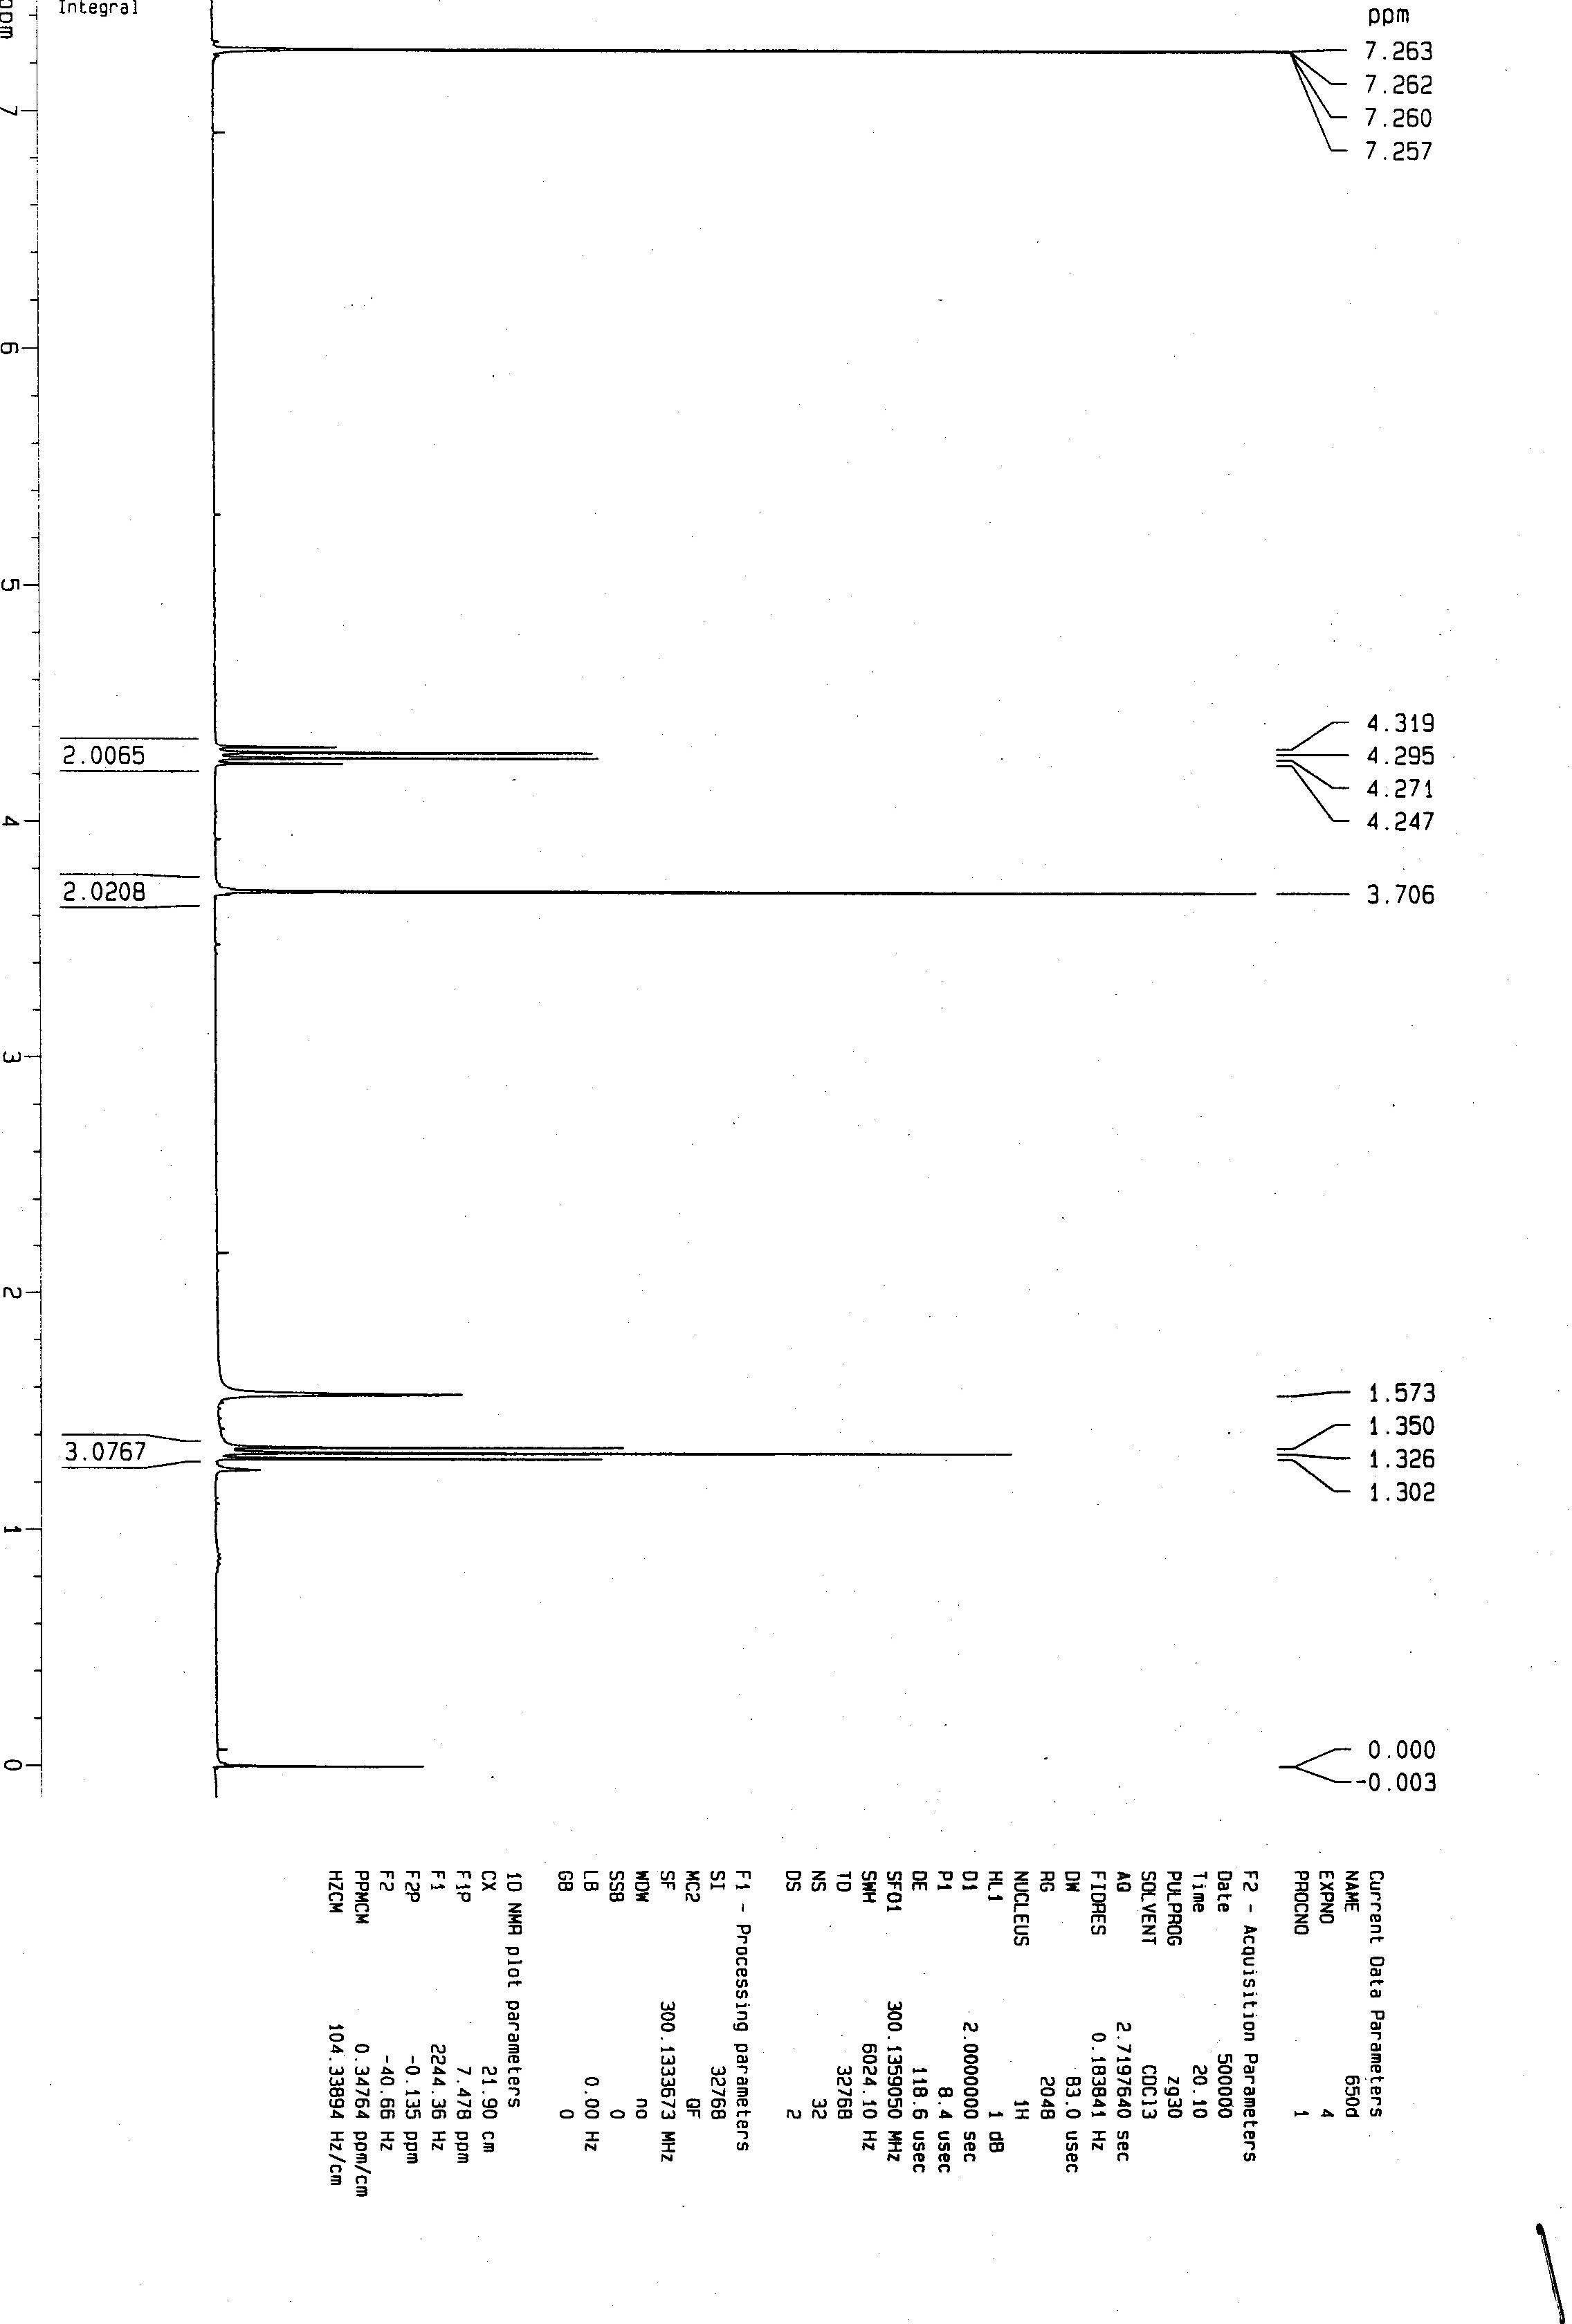


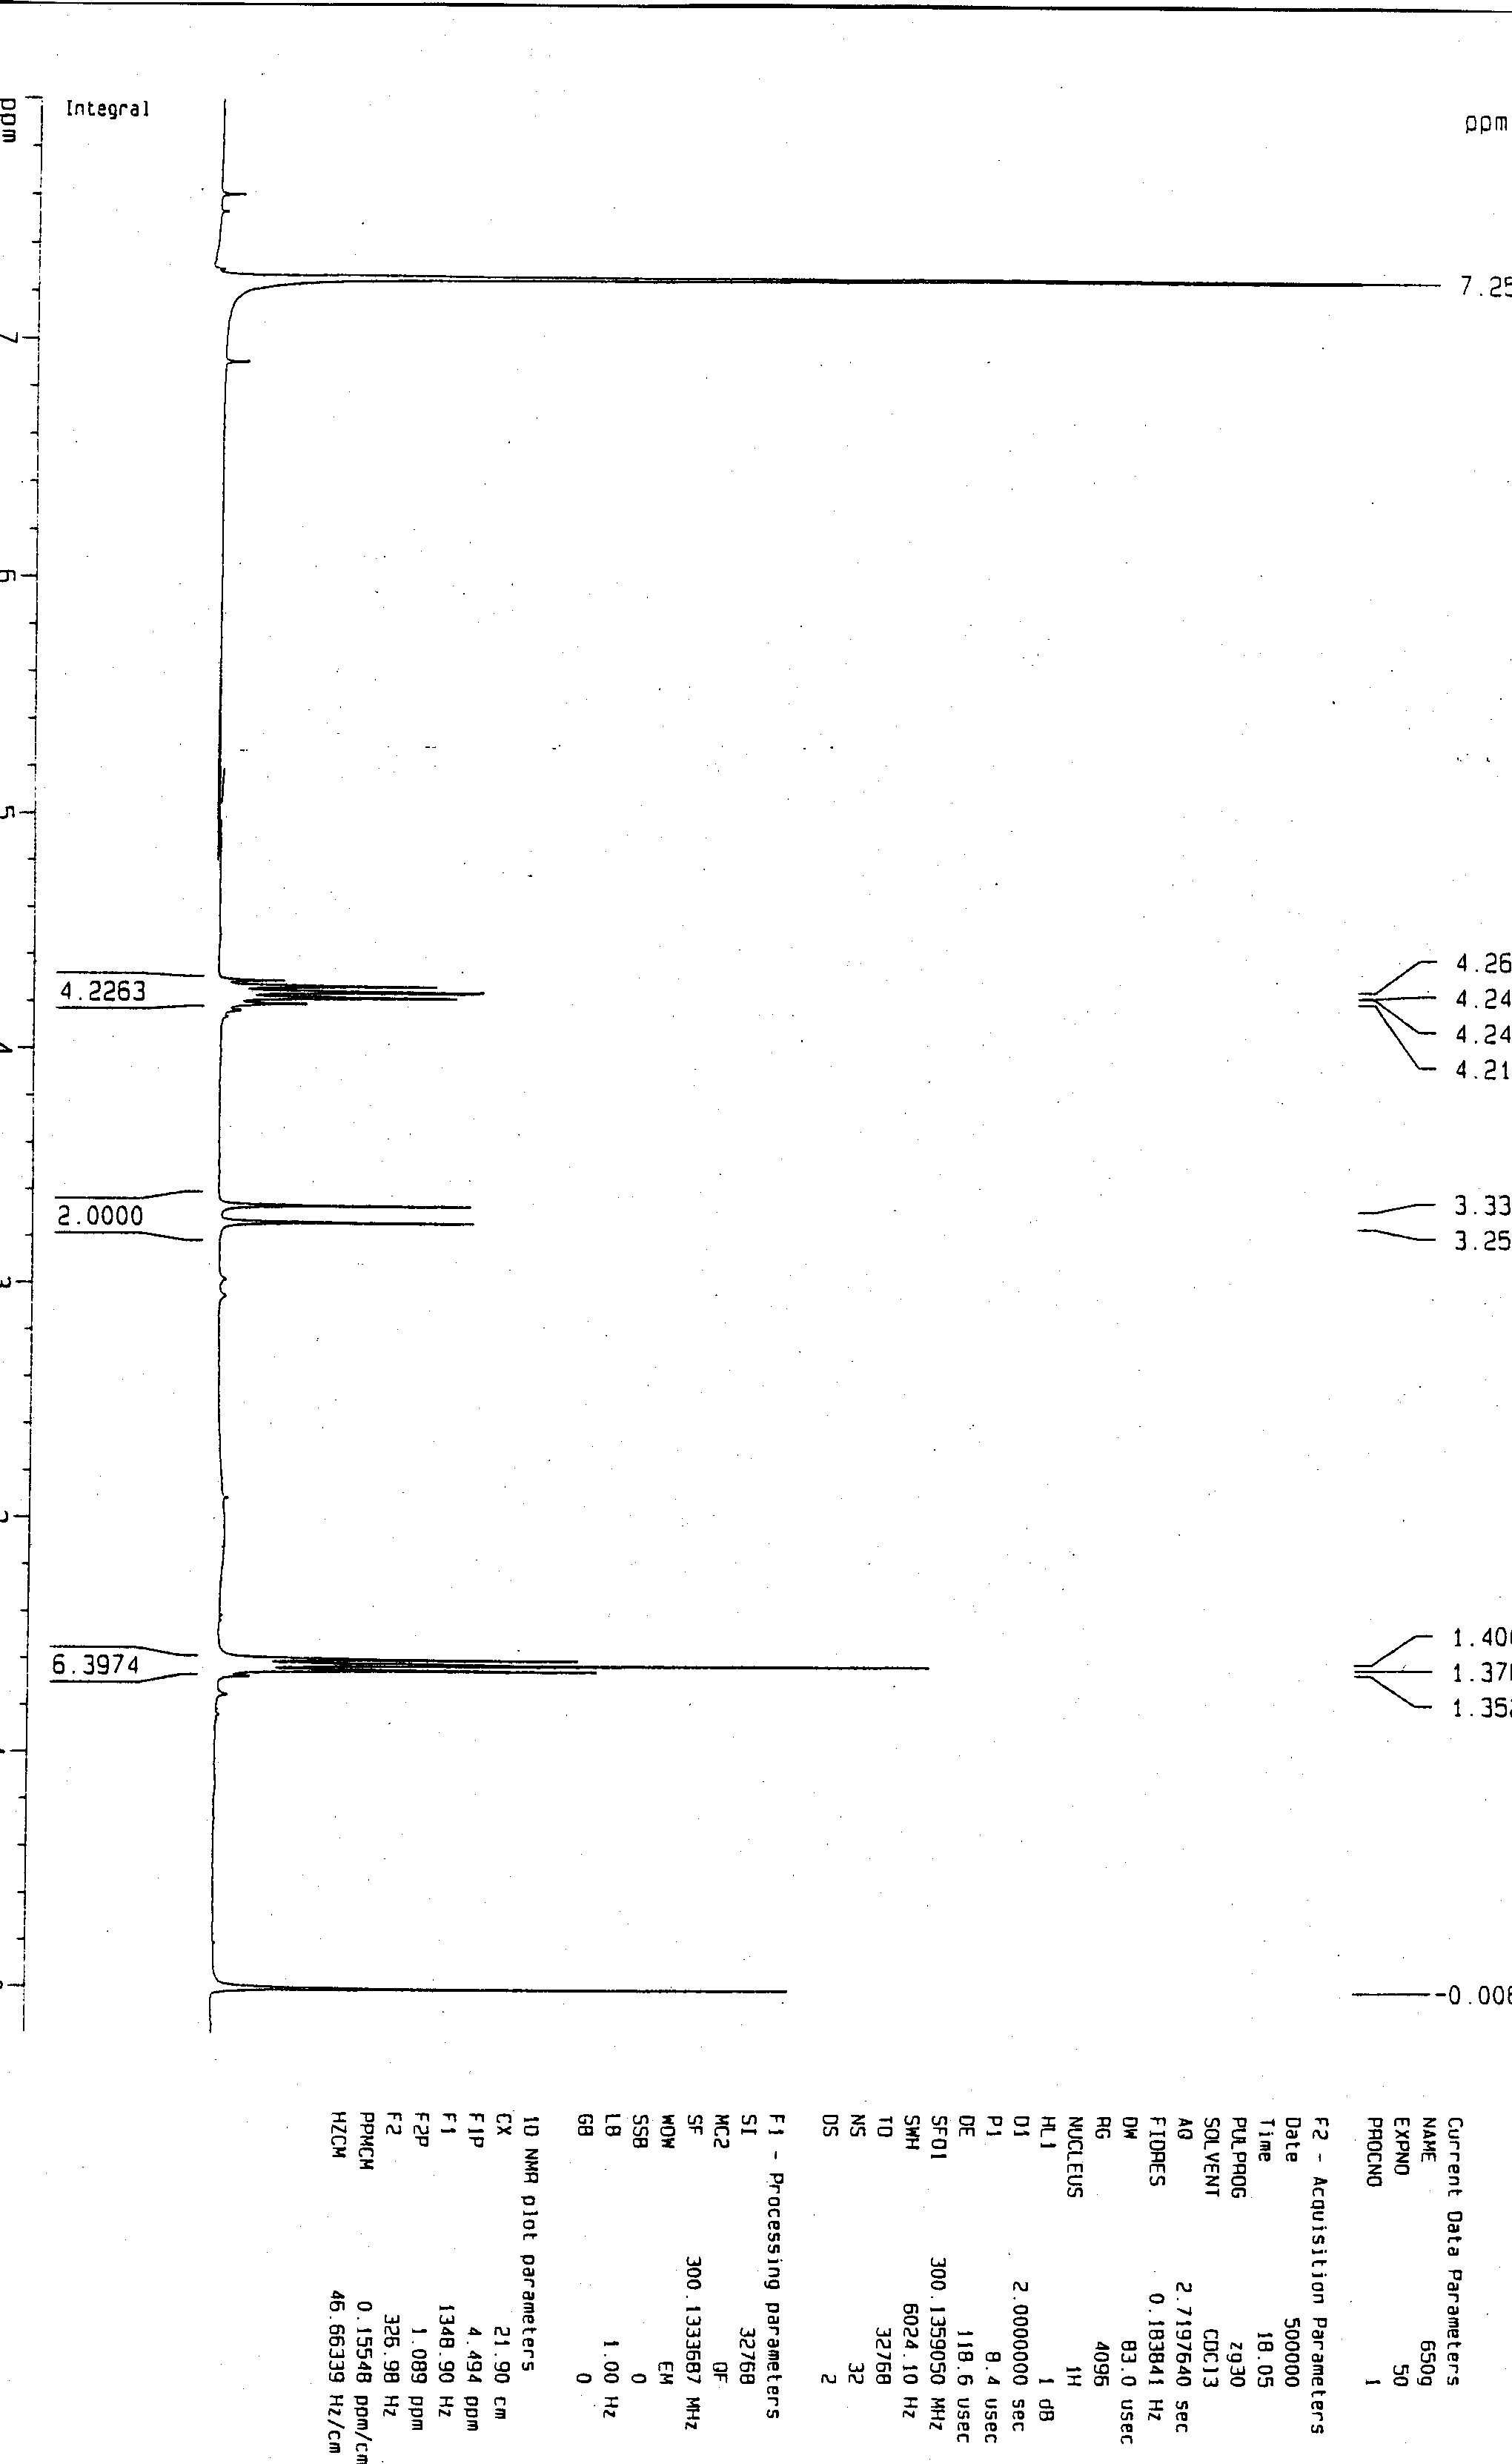


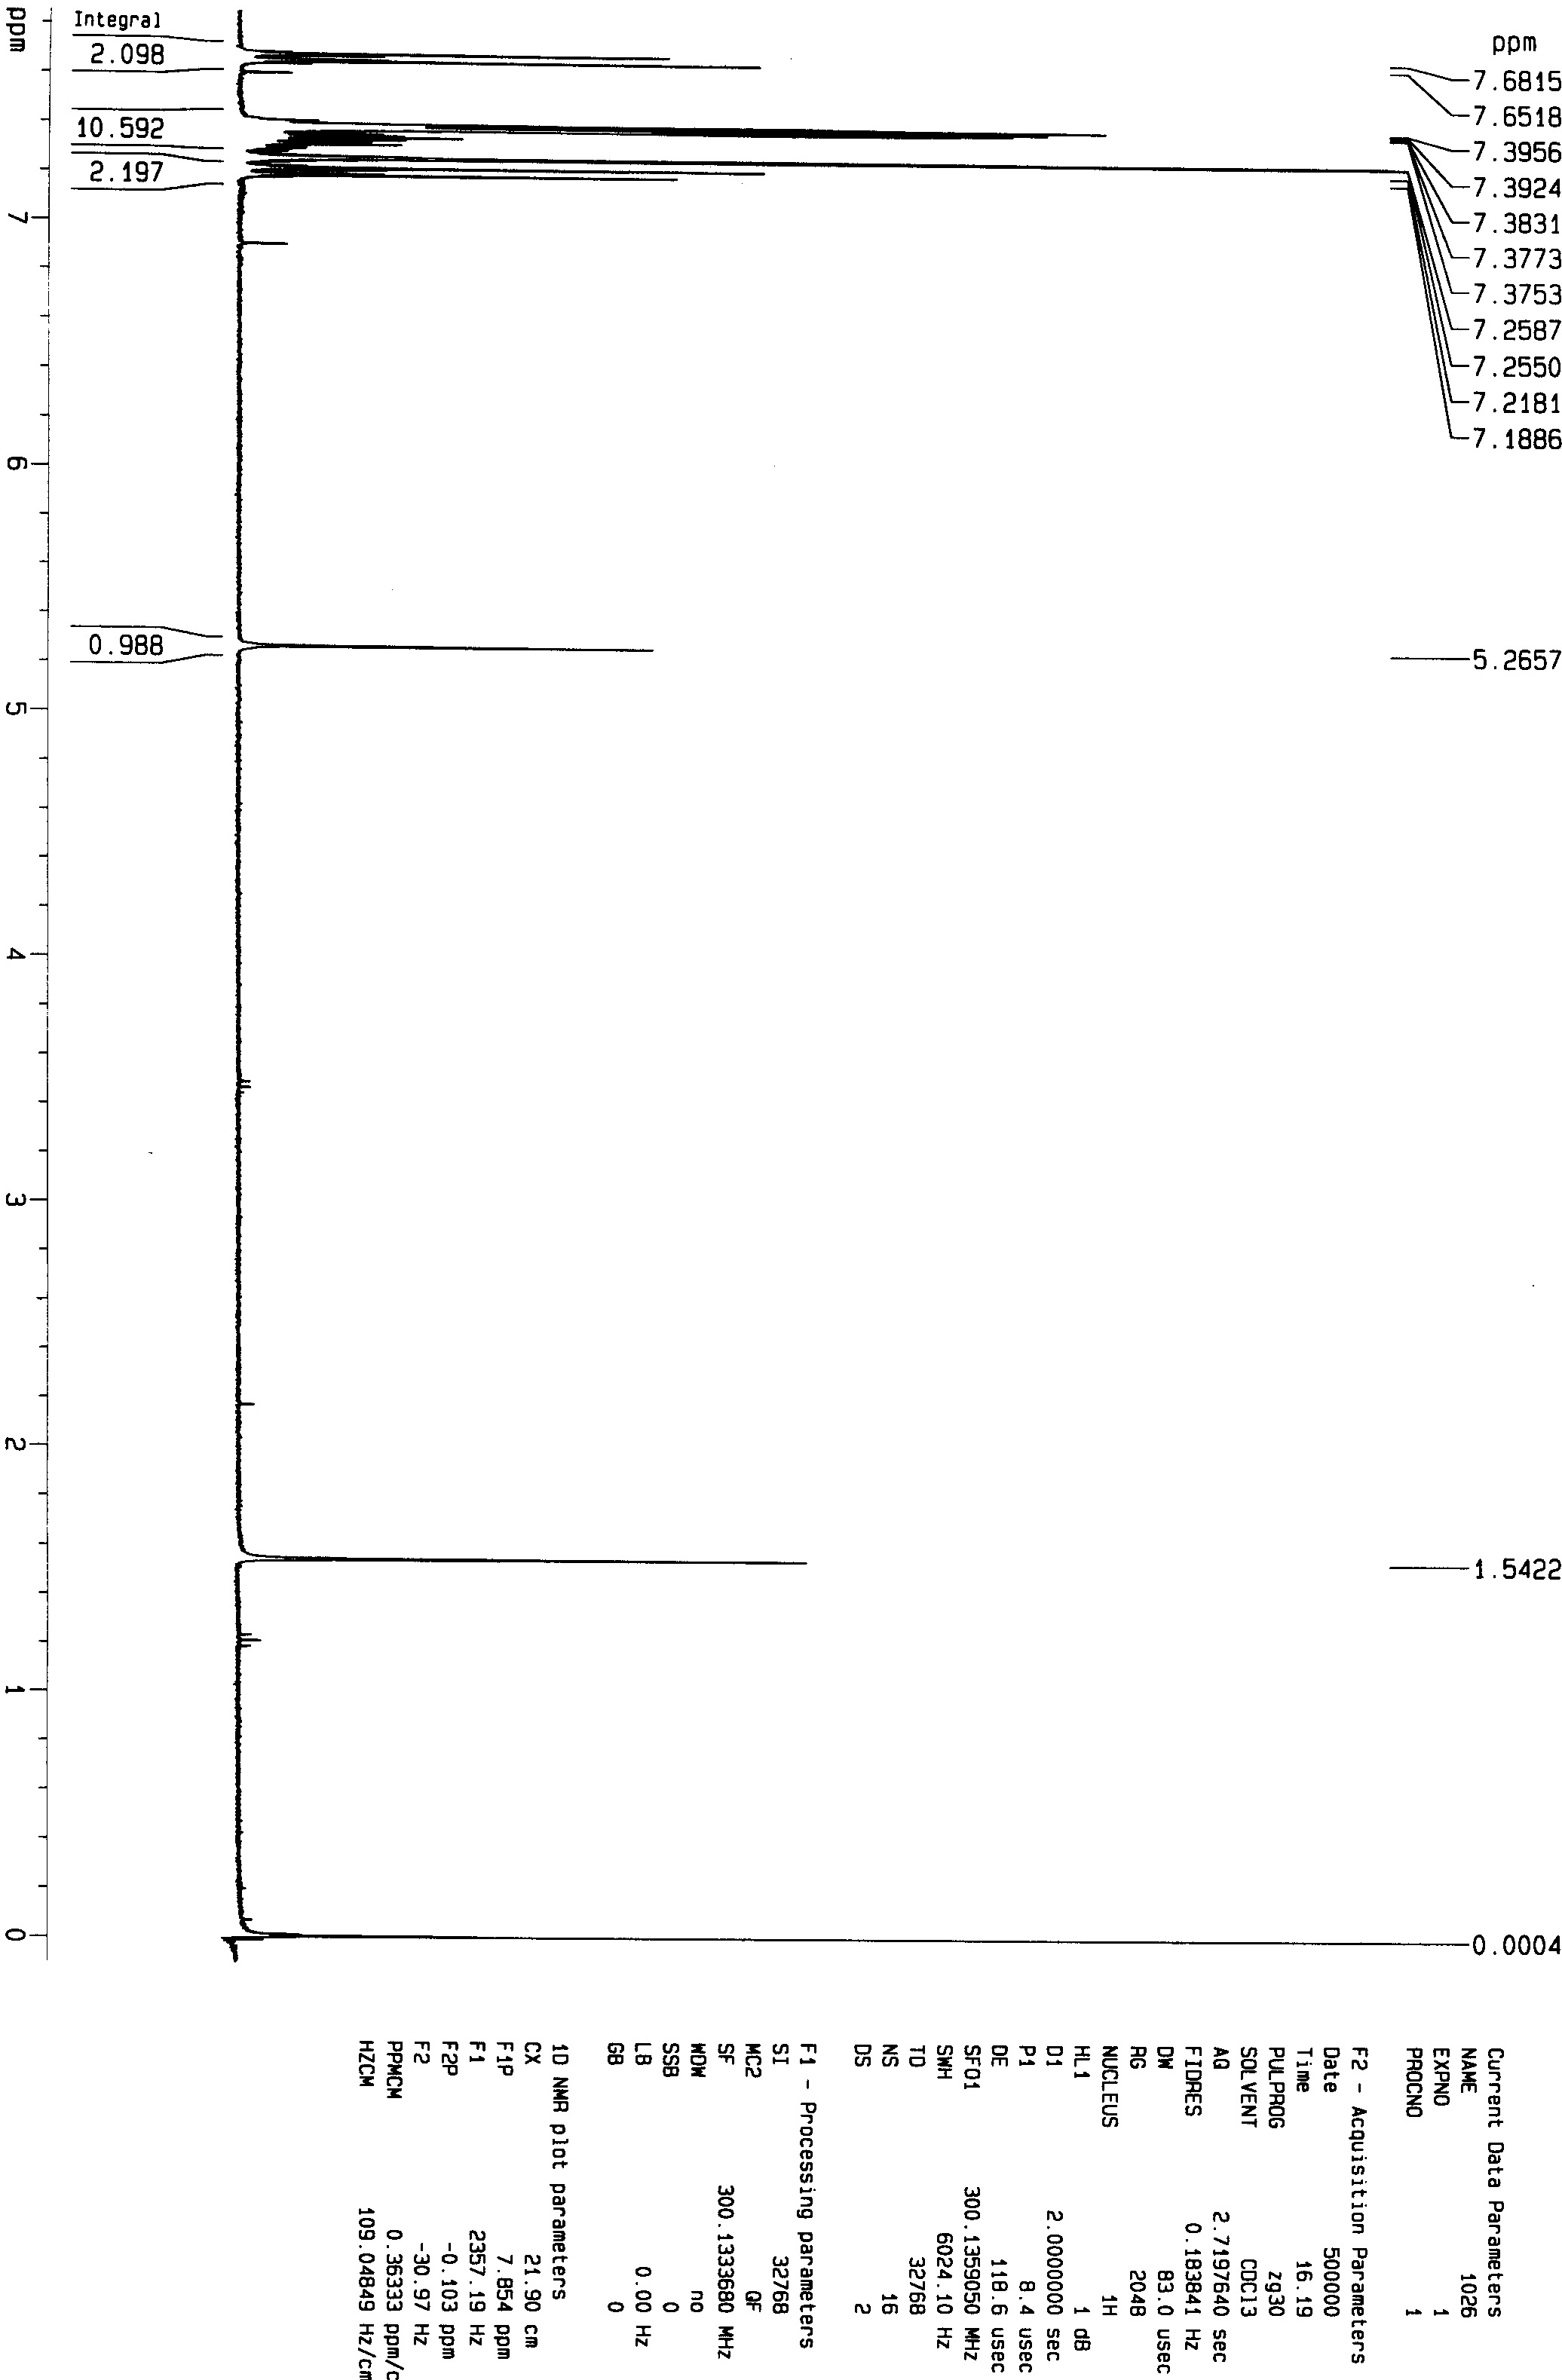


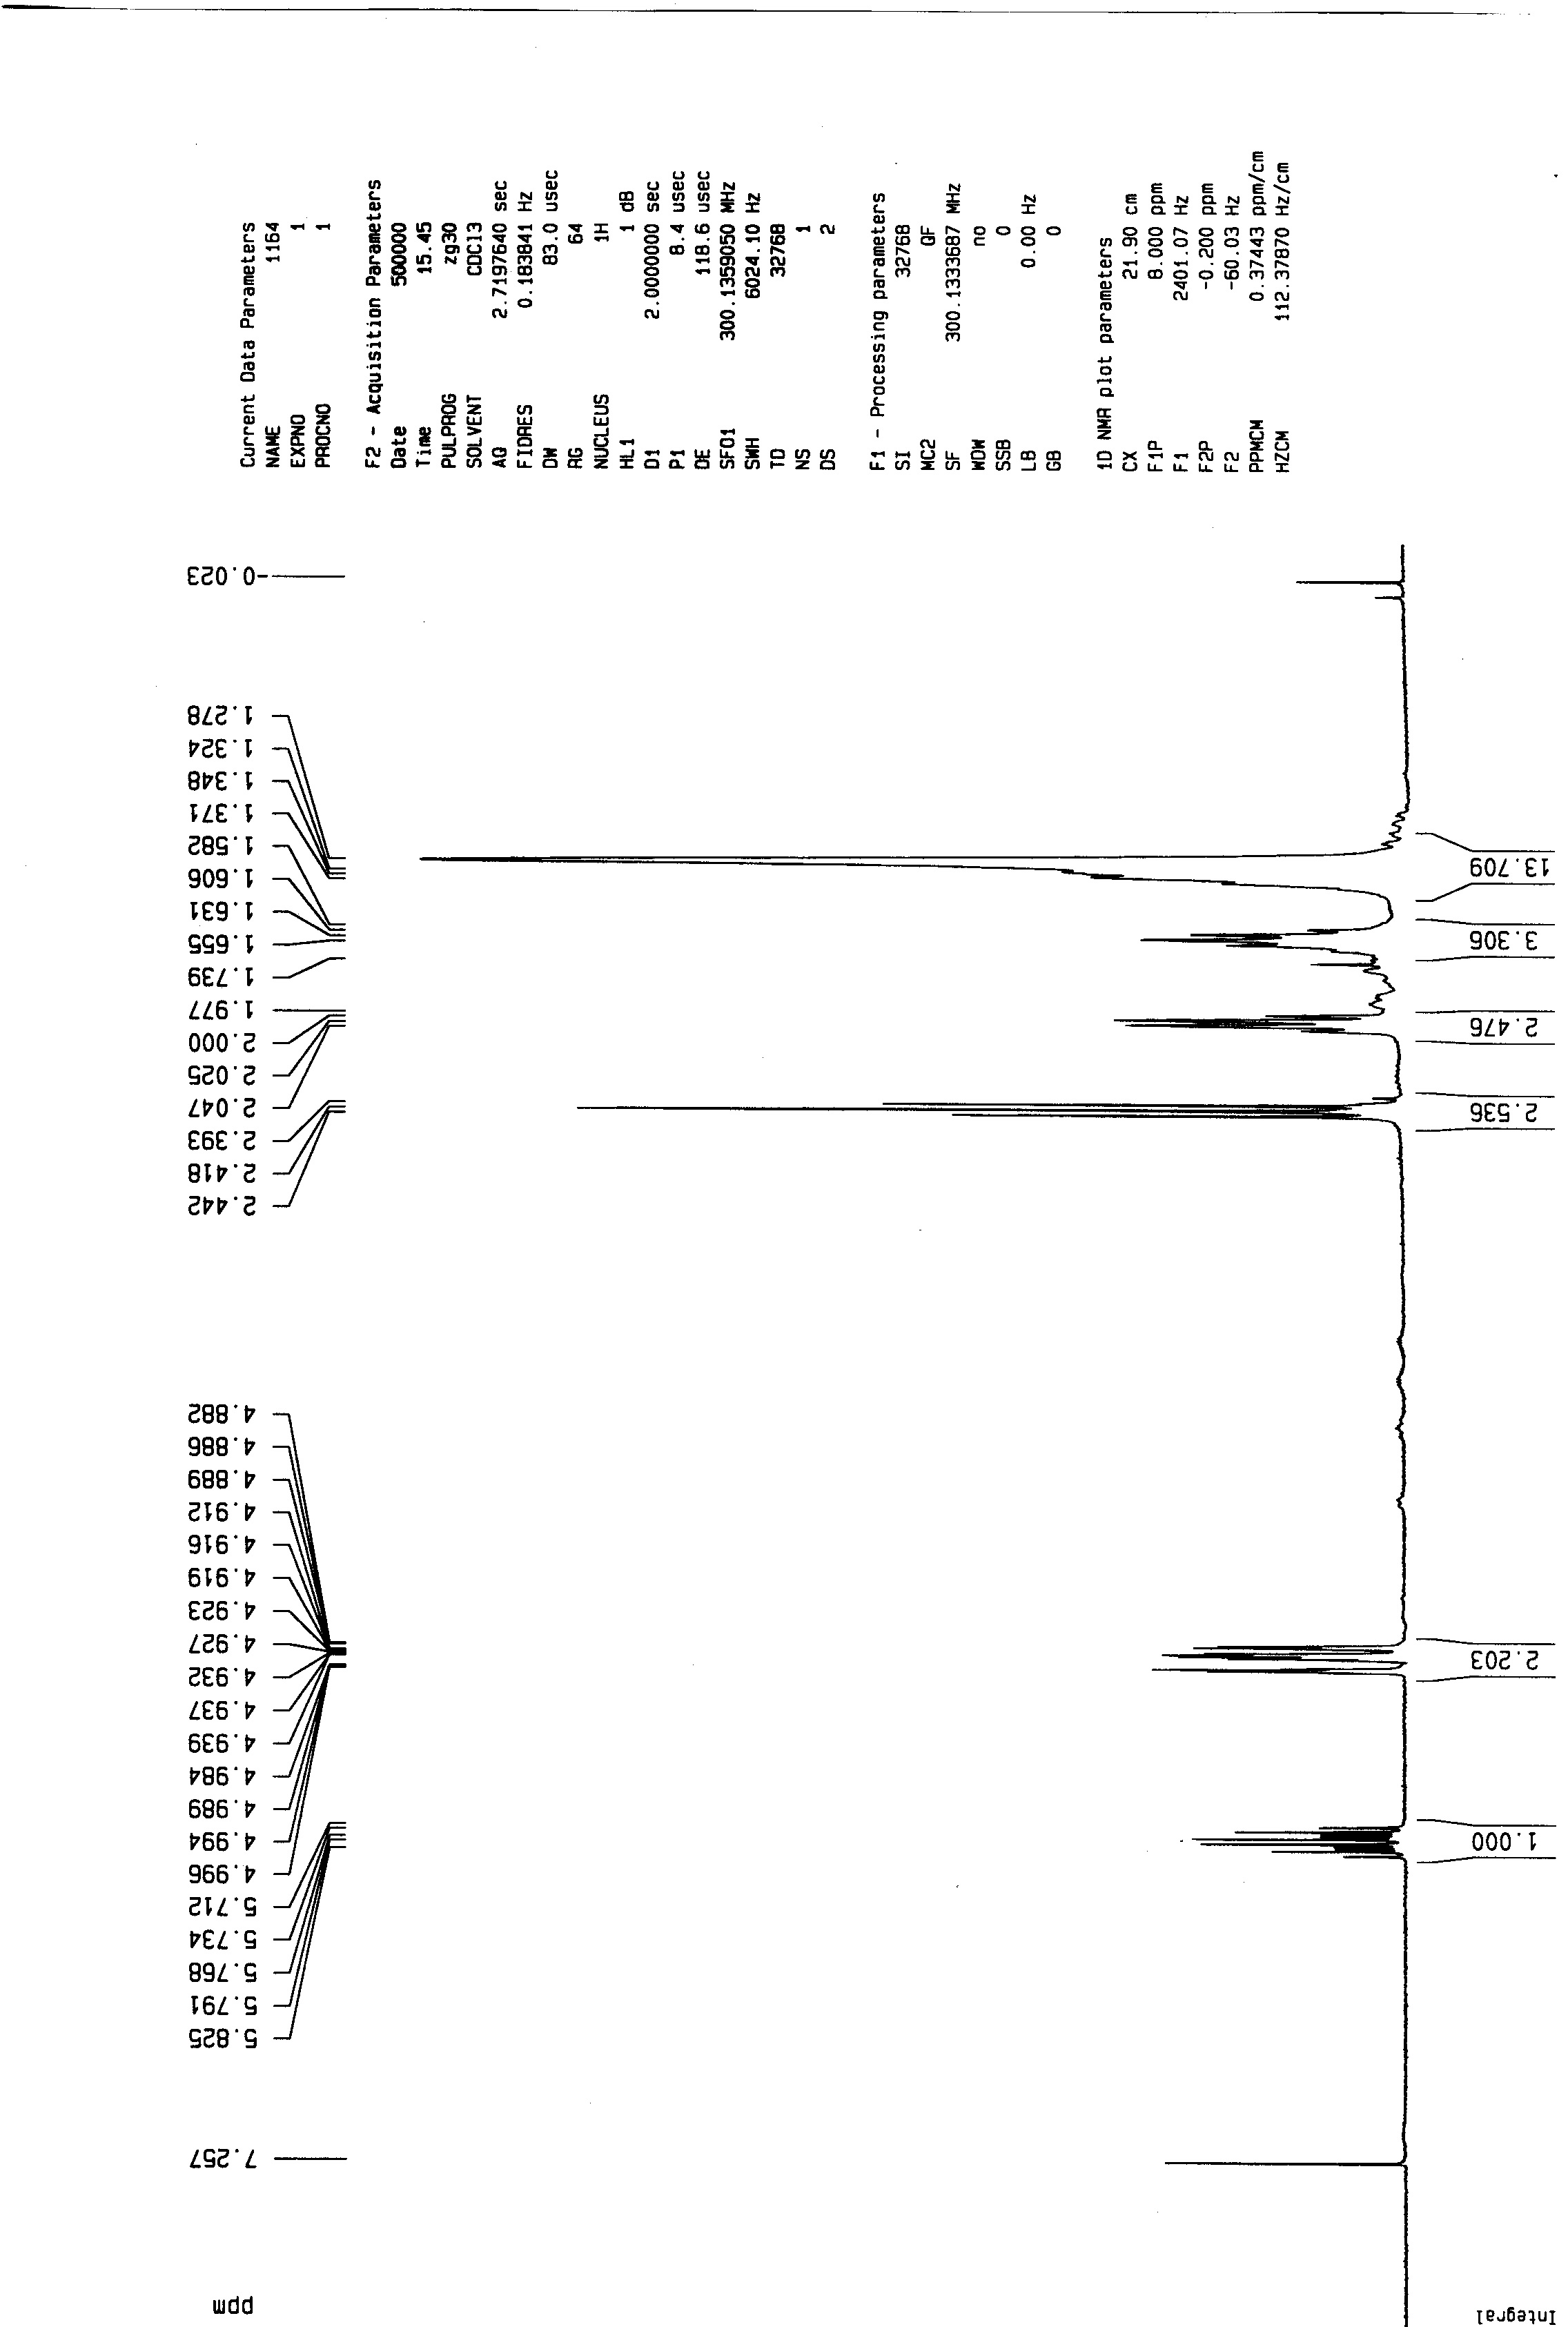


4H

4H

2H

4H

4H

20H
